# Supplementary material for: SLAMF6​ deficiency augments tumor killing and skews toward an effector phenotype revealing it as a novel T cell checkpoint
Source: eLife. 2020 Mar 3;9:e52539. doi: 10.7554/eLife.52539 (PMC7075692; doi:10.7554/eLife.52539)
Supplement: Figure 1—source data 1. [file elife-52539-fig1-data1.csv]

	A_0	B_0	A_3	B_3	A_6	B_6	A_12	B_12	A_24	B_24	A_72	B_72
ABCA1	1.16	0.58	1.99	1.82	0.28	0.48	0.04	0.01	0	0	0.87	0.3
ABCB1	1.28	1.66	21.09	17.78	76.59	50.17	26.35	17.7	3.59	1.86	1.57	1.51
ABCF1	12.8	14.3	80.06	87.17	121.4	127.54	77.32	72.73	60.11	77	33.48	37.34
ABL1	3.47	2.92	3.27	4.54	1.51	2.01	1.54	1.98	2.81	2.06	2.75	3.21
ACADM	15.79	13.25	8.2	7.71	11.25	11.84	23.75	28.14	44.63	33.39	58.63	58.9
ACE	0	0.04	0	0	0	0	0	0	0	0	0	0
ACOX1	2.6	2.24	2.65	2.35	3.37	5.09	8.3	7.19	8.52	6.66	5.87	6.61
ACTA2	0.12	0.16	0	0.18	0.11	0	1.92	0.96	0.72	1.29	4.11	6.22
ACTL6A	28.51	17.48	24.31	30.76	112.09	110.43	136.97	145.56	216.42	176.72	137.46	157.9
ADA	19.53	29.99	10.87	15.13	3.8	4.91	9.55	7.49	10.62	13.93	30.04	48.26
ADAM10	29.56	46.85	14.75	15	12.71	24.12	21.87	28.46	19.05	15.43	23.14	32.16
ADAM17	11.35	10.51	23.04	25.45	43.39	35.2	29.25	27.33	10.11	8.83	15.38	10.71
ADAM19	0.34	1.04	6.82	8.9	16.29	16.07	4.54	5.02	2.54	3.59	11.28	9.72
ADAM8	20.81	42.99	17.93	22.89	12.84	14.68	10.21	9.2	18.31	12.96	32.42	19.69
ADH5	29.11	28.79	34.2	29.1	21.5	19.54	52.33	48.47	68.79	55.16	92.33	81.98
AES	271.1	264.89	120.18	111.13	21.12	23.25	19.56	18.04	13.22	15.1	37.76	37.78
AGER	12.94	8.96	2.43	1.36	1.09	1.89	1.65	2.46	1.42	0.86	1.43	1.63
AGFG1	1.76	1.71	5.54	4.29	9.34	6	7.25	6.9	12.79	10.32	5.01	5.26
AGGF1	7.88	7.94	6.27	8.09	8.28	10.29	15.67	15.99	15.37	13.35	13.8	11.41
AHCTF1	5.39	3.96	7.07	9.21	8.85	8.58	4.99	5.12	4.86	3.94	2.47	3.63
AHR	4.58	8.29	94.83	62.76	86.59	61.39	51.84	37.54	15.35	6.2	7.9	7.87
AICDA	0.57	0.53	0.41	0.87	0.36	0.39	0.2	0.21	0.12	0.13	0.12	0.16
AIMP1	32.59	33.8	55.49	45.46	83.64	65.13	71.59	52.49	60.06	57.81	41.37	39.57
AIRE	0.1	0.39	0.14	0.03	0.09	0.07	0.1	0.02	0.01	0.03	0	0.02
AKAP8	21.92	30.45	62.62	67.2	46.86	48.73	27.74	33.28	22.36	28.45	16.15	16.19
AKAP8L	7.72	8.88	3.97	6.46	4.04	4.61	1.46	2.32	0.84	2.2	2.43	2.72
AKT1	5.96	5.62	4.15	2.58	2.23	4.36	3.7	6.17	5.53	6.19	7.81	8.05
AKT2	6.53	8.32	9.24	13.55	8.82	14.58	7.86	8.3	5.25	7.22	7.51	7.34
ALCAM	1.4	0.77	3.01	3.22	9.09	6.27	1.88	1.34	2.1	1.39	6.84	6.51
ALOX12	0.29	0.18	0.08	0.26	0.06	0.18	0.02	0.13	0.07	0	0	0.03
ALOX5	0.73	0.43	0.35	0.13	0.04	0.24	0	0	0	0	2.19	0.54
ANP32B	178.87	179.15	73.56	88.71	253.49	277.66	286.46	283.56	277.9	306.3	298.39	298.31
APBA2	36.47	51.73	25.72	35.86	5.89	7.72	5.02	7.62	6.34	9.51	7.12	10.71
APC	3.31	5.31	4.04	5.07	2.02	1.43	2.25	2.22	1.99	1.82	1.72	1.86
APOA1	1.5	1.28	1.63	1.01	0.84	0.57	0.37	0.05	0.05	0	0.22	0
APOBEC2	0.94	0.15	0.2	0.1	0.15	0.26	1.04	0.58	0.14	0.28	0.24	0.44
APP	7.71	7.12	4.77	5.03	11.07	10.78	11.67	13.07	8.59	7.3	7.78	9.1
AR	0	0	0	0	0	0	0	0	0	0	0	0
ARAF	54.8	45.36	78.71	76.16	52.93	54.03	40.16	42.69	40.01	41.53	29.79	34.02
ARFRP1	25.14	26.72	10.64	10.63	27.76	34.97	31.64	37.36	26.4	37.66	27.21	30.55
ARRB1	5.19	4.2	1.75	1.1	1.88	1.38	1.22	0.79	4.13	2.63	2.41	2.12
ARRB2	24.77	28.62	12.78	11.27	7.36	14.95	10.7	10.76	7.16	9.85	13.77	18.19
ASPH	3.87	6.04	1.86	1.86	4.1	1.64	2.32	1.31	4.3	1.94	3.28	2.18
ASS1	0.36	0.11	0.81	0.59	1.96	1.66	3.73	1.21	0.48	0.38	30.38	19.71
ATF1	5.36	8.55	47.85	38.79	51.15	35.98	34.15	31.71	33.13	23.7	21.07	19.19
ATF2	15.6	18.33	36.35	31.82	27.39	21.4	35.85	33.87	23	18.13	33.51	24.73
ATF3	0.78	2.13	69.21	27.67	32.56	26.22	16.95	9.25	11.42	7.8	49.48	24.27
ATF7	12.73	15.63	11.72	8.29	10.56	9.3	11.87	12.84	15.54	13.97	12.51	10.85
ATM	17.6	19.43	8.29	8.25	3.74	4.82	3.89	5	1.32	1.02	4.05	3.34
B2M	19589.8	19012.75	14119.34	11343.89	14284.7	11530.49	25434.8	22493.37	23417.74	17833.2	18278.71	15640.45
BACE1	0.06	0.08	0	0	0.02	0.04	0.15	0.05	0.08	0.11	0.15	0.16
BAD	31.04	33.17	37.81	26.85	15.02	12.4	23.76	21.04	26.77	33.78	26.55	32.88
BAG4	5.56	4.57	13.84	11.79	12.69	13.03	18.35	17.15	27.33	18.55	23.53	17.47
BATF	11.72	11.11	21.14	16.45	80.36	54.71	158.01	102.35	115.65	116.04	85.7	81.28
BAX	20.5	17.2	6.29	3.69	17.33	15.16	38.25	30.47	45.12	37.12	40.58	33.11
BBC3	3.15	5.84	1.79	1.72	1	3	1.02	1.48	0.23	0.1	1.4	1.49
BCAP31	111.76	129.17	44.2	46.35	61.27	82.24	152.48	152.88	102.04	144.39	87.21	93.92
BCL10	14.23	15.7	95.94	64.61	54.45	36.24	50.34	45.88	30.88	23.74	31.99	25.94
BCL2	23.6	21.54	15.89	17.37	14.62	19.08	14.76	17.09	4.82	4.04	12.46	8.58
BCL2A1	58.19	42.87	3376.47	2276.32	2795.68	1843.28	756.41	665.76	393.12	345.72	65.76	63.11
BCL2L1	8.57	6.68	1.64	3.44	18.35	14.77	75.11	82.48	76.65	93.87	59.9	67.23
BCL3	1.86	1.44	3.11	6.68	3.73	5.67	2.63	1.86	0.44	0.93	2.57	2.6
BCL7A	1.82	2.72	2.71	2.83	1.52	1.77	2.51	2.25	1.69	2.36	1.29	1.76
BCR	6.57	8.28	4.83	5.3	6.88	5.86	2.81	1.6	3.31	3.11	2.42	2.54
BIRC3	21.28	31.82	54.73	52.74	101.89	95.26	41.15	45.56	14.3	12.73	26.66	25.27
BLM	2.32	1.83	0.91	0.68	1.09	1.06	2.77	3.9	15.73	12.04	20.26	21.2
BNIP3	36.51	39.54	278.04	155.06	122.01	55.87	56.67	51.44	65.33	86.79	539.05	476.86
BRAF	3.16	2.12	15.32	15.9	8.93	7.53	2.5	3.44	1.79	1.2	2.12	1.5
BRCA1	0.78	0.41	0.12	0.27	0.08	0.26	0.24	0.31	7.1	6.08	13.47	14.48
BRCA2	0.37	0.24	0.6	0.7	0.27	0.23	0.31	0.66	1.88	1.68	5.15	4.84
BSG	58.03	81.73	75.65	83.63	106.92	133	130.89	108.91	100.25	125.62	74.18	90.67
BST1	0.49	0.11	0.68	0.17	0.08	0	0	0.02	0.06	0.18	0.73	1.32
BST2	68.5	91.78	22.52	31.92	13.96	16.21	78.83	71.34	102.85	132.32	341.43	297.99
BTK	0.03	0.04	0	0	0.12	0	0	0.08	0	0	0.25	0.11
BTLA	6	8.12	37.46	38.47	89.78	75.26	25.33	63.36	68.2	84.84	39.95	40.91
BTRC	3.14	4.6	4.71	2.49	5.51	5.55	6.61	6.06	6.97	4.71	5.01	4.83
C1QBP	216.66	208.74	419.97	356.88	1256.01	906.82	1341.13	1223.73	2142.48	2011.41	693.5	825.42
C1QL3	0.35	0.16	0	0	0.02	0.12	0.33	0.49	0.25	0.09	0.38	0.39
C1QTNF2	0.11	0.12	0.08	0.14	0.18	0.22	0.02	0.02	0	0.09	0.09	0.02
C1QTNF3	1.38	0.48	0.48	0.5	0.23	0.08	0.47	0.58	0.16	0.22	0.59	0.28
C1QTNF4	0.05	0.2	0	0	0.02	0	0	0	0	0	0.1	0
C1QTNF6	3.53	1.44	1.58	2.36	1.51	1.21	0.57	0.55	0.56	0.35	3.49	1.39
C1QTNF7	0	0.01	0	0	0	0	0.01	0.03	0	0.02	0.07	0
C1R	1.43	1.08	0.86	0.56	0.19	0	0	0.28	0.15	0.01	1.58	1.94
C1RL	2.95	2.92	1.01	0.68	0.79	0.6	0.59	0.5	0.43	0.72	1.46	1.92
C1S	0.01	0.21	0.51	0.21	0.31	0.19	0.14	0.06	0.16	0.15	0.59	0.7
C2	0.05	0.08	0.05	0.22	0.15	0.33	0.04	0.04	0.01	0.01	0.7	0.47
C3AR1	0.45	0	5.75	5.05	3.46	1.39	1.77	0.65	0.26	0.1	4.73	3.08
C4A	0.27	0.24	0.38	0.59	0.32	0.41	0.16	0.17	0.21	0.16	0.48	0.4
C4B	0.14	0.14	0.14	0.23	0.13	0	0.05	0.07	0.03	0.04	0.23	0.16
C4BPB	0.53	2.02	2	1.14	0	0.88	1.1	0.51	0	0.29	2.12	1.38
C5	0.26	0.9	0.02	0.2	0.01	0.09	0	0	0.02	0.23	0.56	0.76
C5AR1	0.21	0.02	0.14	0.26	0.2	0.21	0	0.01	0	0.05	0.1	0
C7	0.14	0.09	0.29	0.18	0.15	0.09	0.11	0.09	0	0.13	0.09	0.05
CA2	0.15	0.16	15.42	9.61	16.35	8.67	3.08	3.57	4.21	2.19	17.6	10.14
CALM1	285.51	327.71	676.93	599.54	332	393.26	344.3	334.5	172.73	181.62	119.35	140.76
CAMK2G	25.05	22.87	8.59	5.89	2.55	2.88	6.3	6.91	6.81	8.04	11.71	16.58
CAMK4	142.25	147.51	70.98	76.8	99.36	97.91	63.27	57.1	27.14	20.59	53.21	36.15
CANX	63.45	68.88	55.76	53.11	142.5	160.77	248.71	241.26	205.71	151.88	201.02	161.36
CAPN1	31.63	40.42	11.39	10.94	5.25	6.41	19.77	24.01	24.35	27.36	57.62	59.33
CARD11	19.94	16.86	6.88	9.61	7.26	10.57	5.56	7.03	11.01	17.19	15.71	11.3
CASP1	46.98	27.1	8.6	3.98	2.27	4.03	20.37	12.54	15.91	15.06	50.74	46.08
CASP10	10.8	9.59	11.88	12.06	13.42	12.71	10	8.03	5.88	5.8	20.12	15.2
CASP2	25.7	20.77	15.1	15.86	13.12	17.1	29.58	31.39	50.35	50.47	64.99	65.48
CASP3	5.27	4.22	36.18	15.3	16.83	12.78	42.99	43.62	56.54	43.54	180.02	191.78
CASP6	17.53	22.03	5.94	6.05	3.84	4.63	9.71	10.54	9.81	9.3	26.31	31.68
CASP7	10.01	5.87	11.65	10.85	15.83	9.47	17.83	11.1	14.68	9.56	45.19	35.49
CASP8	48.65	27.58	77.73	49.71	36.35	33.02	18.14	17.28	13.42	9.27	30.22	21.16
CASP8AP2	7.14	10.51	2.85	3.51	2.37	2.44	4.56	4.4	8.01	6.68	8.63	8.4
CAV1	0.29	0.13	0	0.04	0.2	0.5	0	0.11	0.08	0.05	0.74	1.17
CBL	5.4	7.4	3.1	3.93	1.8	3.41	3.57	4.16	2.18	2.3	4.24	4.47
CCBP2	0.04	0.11	0.28	0.17	0.04	0.14	0.02	0.02	0.03	0.21	0.66	0.76
CCL22	0.75	0.24	0.69	0.31	0.42	0.51	0.64	0.38	0.98	0.76	30.77	29.65
CCL27	1.17	0	1.04	0	0	0.54	0	0	0	0	0.33	0
CCL28	12.83	10.58	5.9	4.18	1.46	1.61	5.3	4.89	4.87	5	30.76	24.61
CCL3	0.07	0	0.46	0	2.13	0	1.39	0	18.56	14.12	20.63	13.33
CCND1	0.07	0.4	7.42	7.98	22.85	15.69	13.25	15.62	6.28	7.51	0.27	0.28
CCND2	21.07	21.29	28.45	42.86	165.21	160.24	140.74	141.8	474.49	347.05	119.09	113.89
CCND3	556.98	675.63	159.57	158.62	74.91	63.74	189.28	218.61	1035.51	734.09	528.53	559.53
CCR10	1.47	0.26	0.34	0.05	0.07	0	0	0	0.07	0.13	0.69	0.84
CCR4	0.91	0.99	41.35	46.88	175.72	171.81	112.77	140.68	52.25	45.47	99.1	103.19
CCR6	0.9	0.96	0.57	0.74	0.72	0.87	0.53	0.71	0.46	0.34	0.58	0.83
CCR7	460.1	626.58	274.58	423.56	286.7	643.37	719.76	531.5	93.9	106.62	770.97	674.1
CCR9	0.95	0.17	0.2	0.28	0.22	0	0.22	0.08	0.03	0	0	0
CCRL1	0.35	0.12	0.29	0.58	0.18	0.4	0.05	0.48	0.39	0	1.01	1.47
CCRL2	0.92	1.18	4.58	3.32	0.97	1.35	0.88	0.68	0.78	0.56	6.68	6.67
CCRN4L	1.67	3.65	9.92	7.89	12.89	8.81	8.47	6.38	9.51	4.38	6.21	5.27
CD101	0.97	2.62	0.85	0.98	0.41	3.33	0.34	1.66	0.32	0.65	0.49	0.91
CD109	0.15	0.17	7.22	5.91	13.92	5.19	2.51	1.57	2.13	1.48	7.45	4.68
CD14	0.59	0.89	0.35	0.83	0.15	0.33	0.02	0	0.1	0.46	0.58	0.62
CD151	3.64	1.95	0.95	0.25	3.54	3.46	6.38	2.41	8.3	5.7	13.84	12.3
CD160	0.69	0.23	0.11	0.4	0.18	0.12	0.24	0.22	0.45	1.38	2.68	2.36
CD164	82.14	97.72	307	253.29	283.39	250.18	201.06	192.04	184.58	162.69	344.36	260.15
CD1D	0.04	0.02	0.07	0.02	0	0.06	0	0	0.02	0	0.01	0.01
CD2	147.35	172.42	494.45	598.87	914.32	915.49	674.95	596.42	586.85	611.77	433.96	419.3
CD200R1	6.55	8.02	1.84	2.44	1.73	2.81	2.13	2.33	0.95	0.65	1.79	2.55
CD209	0.26	0.11	0.2	0.38	0.18	0.22	0.05	0.12	0.06	0.06	0.05	0.07
CD226	6.36	7.38	6.35	5.8	28.22	13.99	9.29	8.23	13.86	16.68	5.21	6.38
CD244	1.94	1.47	1.55	2.17	0.47	0.74	0.33	0.11	0.22	0	0	0.2
CD247	319.91	300.94	143.07	225.06	88.84	125.9	149.25	142.26	128.11	124.51	277.55	257.18
CD248	1.71	2.26	0.97	2.15	0.11	0.12	0.02	0	0.01	0.09	0.26	1.1
CD27	186.23	223.17	62.52	88.49	108.01	254.23	113.49	210.9	188.06	295.72	191.22	266.7
CD274	2.02	3.08	6.32	5.88	11.18	7.81	26.14	9.26	7.75	9.66	18.47	13.39
CD28	43.99	42.3	88.94	93.19	72.28	104.9	116.56	91.72	24.2	23.73	60.28	51.05
CD2AP	2.88	2.61	5.57	5.4	4	2.75	4.55	3.17	4.87	2.86	4.36	3.31
CD2BP2	17.71	12.75	31.37	31.8	45.68	49.46	44.07	49.23	34.39	41.99	23.6	20.27
CD300A	3.06	3.41	0.57	1.07	0.02	0	0.22	0.47	0.64	0.65	14.25	13.03
CD300LG	0.18	0.2	0.22	0.35	0.16	0.23	0.26	0.13	0	0.02	0.04	0.15
CD320	25.66	39.4	14.5	15.39	63.6	66.38	89.57	85.59	122.21	167.39	43.32	63.15
CD33	0.33	0.23	0	0	0	0	0.11	0	0.81	0.06	5.57	0.87
CD37	394.61	469.75	224.84	262.85	78.24	94.5	70.17	89.47	69.66	86.54	158.05	157.57
CD38	10.35	9.88	3.84	2.91	7.81	6.74	35.64	20.96	22.1	19.96	148.51	113.77
CD3D	912.67	898.3	1412.31	1497.15	2857.73	3186.16	1927.49	1967.25	965.96	831.38	433.4	526.12
CD3E	347.73	423.21	161.82	192.3	231.21	287.94	165.38	185.49	151.65	133.54	124.3	140.26
CD3EAP	1.3	1.46	3.15	3.47	35.68	23.61	17.67	14.7	26.43	24.53	2.83	3.88
CD3G	165.87	204.67	110.82	119	163.08	220.08	100.45	145.05	74.69	80.11	64.31	83.34
CD4	135.37	253.84	65.18	78.12	13.94	28.51	13.47	17.35	41.12	65.19	228.22	270.01
CD40	3.63	2.07	1.85	1.49	1.3	0.56	5.67	3.74	3.07	3.86	9.04	5.41
CD40LG	66.28	84.04	2704.35	2079.47	2308.36	1194.84	115.44	110.45	215.45	253.12	112.08	155.34
CD44	251.81	282.44	947.49	794.27	1758.81	1335.21	513.44	545.33	272.43	191.21	219.38	188.57
CD46	59.63	59.54	56.49	45.86	37.16	34.8	79.65	79.97	62.15	48.81	72.01	62.34
CD47	79.22	90.25	58.74	46.38	91.04	72.15	139.73	125.55	93.01	65.67	86.04	70.51
CD48	446.61	483.28	592.95	485.51	782.51	471.56	439.49	508.25	1551.57	1284.34	701.33	582.97
CD5	195.51	184.81	235.1	335.71	207.82	376.59	196.38	235.41	179.79	197.89	257.4	200.72
CD52	2491.5	2808.58	1319.42	1580.79	929.68	1408.98	485.75	553.34	535.24	591.17	904.63	1271.32
CD53	468.41	428.23	727.92	587.54	834.94	724.9	686.68	511.87	254.69	252.11	447.61	386.87
CD58	2.19	2.64	10.17	14.51	10.57	20.32	8.09	10.84	16.84	9.81	24.06	24.63
CD59	8.73	8.62	17.34	20.83	27.57	37.13	29.72	40.05	7.94	9.52	10.07	15.41
CD6	122.75	141.57	241.59	326.36	200.56	261.09	207.03	149.08	82.51	107.98	51.02	51.34
CD63	34.08	31.46	22.3	19.4	65.75	68.72	122.73	97.1	117.31	125.43	85.47	97.87
CD68	0.19	0.78	1.09	1.02	1.69	1.22	1.25	0.64	3.08	1.28	18.75	11.52
CD69	445.63	566.6	4484.11	3399.24	4051.66	2787.34	1620.41	1490.57	489.82	382.43	379.25	262.3
CD7	30.2	45.11	31.77	58.3	51.91	73.84	18.4	31.85	17.86	26.21	32.47	35.15
CD70	0.03	0	0	0	0.06	0.06	0.1	0.19	2.5	2.26	22.22	15.9
CD72	0.97	1.83	0.48	0.32	0.35	0	0.48	0.83	1.92	1.58	13.18	10.67
CD74	224.43	263.52	163.35	175.45	115.19	119.76	257.67	249.76	350.73	442.35	396.32	401.96
CD79A	4.3	6.09	2.82	3.94	2.41	4.16	0.08	0.04	2.55	1.34	14.05	19.24
CD79B	13.3	19.18	2.31	1.82	0.18	1.39	3.52	5.62	17.54	24.61	39.69	53.35
CD81	8.82	11.48	19.16	19.49	21.44	21.29	15.44	17.2	9.23	10.69	7.82	8.56
CD82	27.71	36.03	50.54	63.55	608.54	634.83	295.03	410.16	248.91	445.41	150	210.95
CD83	6.57	11.6	109.66	108.74	164.97	130.83	84.64	98.71	36.57	32.42	42.1	42.76
CD84	4.32	6.48	6.16	10.64	15.5	25.37	4.86	10.37	1.41	2.76	4.12	3.57
CD86	0	0.16	0	0	0	0	0	0	0	0	0	0
CD8B	7.3	8.78	1.09	1.47	0.3	0.89	1.08	2.08	2.14	4.03	18.39	25.78
CD9	4.15	5.04	3.13	4.57	16.31	18.66	6.18	8.83	7.42	6.56	9.22	11.92
CD96	81.09	84.35	105.8	106.44	202.28	219.08	107.78	119.03	5.56	8.94	40.1	46.3
CD97	147.02	144.04	349.79	323.98	512.29	608.08	240.72	227.55	117.11	131.02	94.15	93.96
CD99	139.66	125	130.98	132.85	196.02	180.03	156.95	178.98	189.08	197.75	201.61	178.15
CD99L2	6.83	6.27	2.35	3.59	3	6.08	3.97	4.81	3.29	4.42	6.94	8.19
CDC37	153.97	162.57	195.63	189.39	341.6	345.56	315.4	273.13	216.93	281.4	190.56	184.84
CDC42	265.97	392.16	537.59	562.58	418.57	466.75	376.85	489.98	294.24	331.38	248.68	323.89
CDK2	6.96	5.54	3.99	3.08	2.61	3.5	15.54	10.66	47.56	28.84	98.34	76.08
CDK4	25.21	26.82	30.36	26.76	246.68	255.46	194.86	200.76	303.64	371.34	156.14	192.98
CDK9	13.44	16.71	17.36	15.18	18.31	17.46	16.32	15.15	14.58	14.79	10.3	10.76
CDKN1A	2.52	3.48	93.45	117.2	102.24	125.74	51.1	39.04	16.88	13.4	42.68	28.71
CEACAM1	3.76	1.39	1.64	2.17	0.64	0.81	0.27	0.3	0.29	1.02	30.07	21.26
CEACAM5	0.19	0.15	0.32	0.24	0.28	0.23	0.22	0.12	0.09	0.06	0.09	0.1
CEACAM8	0.35	0.2	0.35	0.59	0.34	0.48	0.21	0.18	0.05	0.28	0.17	0.07
CEBPB	3.21	4.01	2.53	1.95	4.95	5.27	2.45	1.81	0.56	0.44	2.96	2.72
CEBPE	0.34	0.46	0	0	0	0	0	0	0	0.01	0.18	0.25
CENPJ	1.25	2.26	0.67	1.09	0.43	0.66	1.02	0.68	3.69	2.97	7.45	7.5
CFD	2.72	8.36	0.68	0.93	0.18	0.04	0.05	0.18	2.24	3.11	5.68	10.81
CFLAR	65.86	61.5	98.29	73.11	173.81	124.51	398.66	251.82	453.62	269.22	267.79	164.93
CFP	19.08	29.3	9.34	9.97	1.25	2	1.03	0	0.32	0.34	5.16	3.71
CHUK	3.82	2.69	22.23	17.93	21.09	13.64	15.22	14.09	20.27	15.98	7.77	9.86
CIITA	0.09	0.35	0.08	0.07	0.03	0.17	0.16	0.07	0.04	0.02	0.06	0.07
CISH	29.78	31.94	5.86	6.71	72.43	31.54	149.4	216.7	255.26	224.32	474.28	528.53
CKLF	47.21	40.78	16.26	14.82	24.44	38.46	35.5	39.48	91.03	73.18	129.65	136.33
CLCF1	0	0.26	0.17	0.17	0.1	0.31	0.24	0.13	0.02	0.01	0.79	0.52
CLEC4A	0.79	1.06	2.59	2.79	0.73	1.63	0.47	1.59	0.6	0.39	0.37	1.02
CLEC4E	0.03	0.08	0	0	0.08	0.02	0	0.02	0	0.05	0	0
CLEC7A	0.44	0.19	0.22	0.68	0.17	0.12	0.09	0.16	0.13	0.17	0.07	0.11
CLIP1	10.34	12.02	5.86	6.99	4.31	5.17	10.97	6.06	7.9	8.26	10.59	9.46
CLIP2	0.19	0.24	0.08	0	0	0	0	0	0	0	0	0.21
CLU	0.51	0.66	0.18	0.11	0	0.4	0.01	0.17	0.17	0.16	0.06	0.15
CMTM3	20.28	26.72	11.74	10.11	10.11	11.52	16.53	10.65	12.3	11.38	15.52	16.47
CMTM4	0.27	0.23	0.6	0.22	0.19	0.27	0.2	0.65	0.53	0.32	0.29	0.19
CMTM6	22.56	26.53	63.61	46.23	31.41	37.82	52.91	55.21	41.91	39.86	65.01	76.47
CMTM7	114.51	120.19	29.98	26.11	20.79	16.38	10.82	12.28	18.14	9.28	75.53	82.48
CMTM8	4.35	6.71	2.82	4.69	3.53	2.89	3.47	4.07	7.12	7.54	8.11	6.57
COMMD1	36.06	30.96	20.1	15.06	31.08	34.06	83.39	65.47	66.38	60.19	56.34	56.66
COPS3	39.46	46.82	162.15	148.79	208.96	183.41	166.16	162.14	205.53	184.35	112	130.76
CR1	0.25	0.8	0.11	0.07	0.06	0.03	0.02	0.05	0	0.03	0.02	0.01
CR2	0.55	1.83	0.49	0.88	0.61	0.15	0.09	0.01	0.59	0.38	0.16	0.06
CRADD	12.35	11.34	9.03	9.89	20.2	17.3	21.95	19.76	18.49	13.52	14.85	14.18
CREB1	6.82	8.28	3.53	3.78	6.12	8.17	11	13.19	10.02	8.93	7.99	8
CREBBP	8.23	9.46	10.96	14.56	5.61	6.51	3.31	4.31	1.86	1.97	1.99	1.99
CRK	4.81	3.66	16.47	13.77	12.64	8.06	7.83	7.09	4.22	3.89	3.13	3.09
CRKL	21.88	23.37	37.4	41.09	41.39	44.15	43.16	56.98	45.45	43.19	46.67	44.94
CRLF3	100.6	97.91	34.97	27.8	50.05	49.5	60.85	60.22	64.8	50.39	70.27	63.08
CSF1	0.07	0.29	12.51	11.81	68.44	35.31	27.52	16.76	5.87	5.56	6.24	3.67
CSF1R	0.05	0	0	0.27	0.06	0.15	0	0.16	0.03	0	0.03	0
CSF2RA	0.38	0.2	0.13	0.25	0.11	0.1	0.06	0.02	0	0.05	0.1	0.03
CSNK2A1	25.48	28.25	44.78	46.2	109.14	93.96	99.97	95.95	117.35	97.71	89.63	91.26
CSNK2A2	3.05	3.39	3.02	3.78	3.39	2.05	3.3	2.9	2.52	3.55	3.26	3.9
CTLA4	28.62	10.26	30.48	22.78	32.07	26.13	51.36	42.04	52.25	35.58	142.72	67.69
CTNNB1	47.37	39.26	169.37	144.46	99.45	81	89.6	84.54	69.18	55.37	64.92	55
CTSB	41.13	48.53	17.61	22.05	24.63	31.5	40.9	42.92	34.24	37.27	52.93	62.86
CTSS	40.93	49.24	24.91	21.62	12.76	14.68	25.23	17.18	16.12	17.86	44.26	36
CUL1	40.09	43.4	67.61	67.14	65.22	70.14	64.8	67.26	61.23	61.26	61.44	58.97
CUL4A	19.29	17.12	20.68	22.7	60.6	57.03	53.66	52.08	52.52	48.78	36.3	38.25
CX3CR1	0.02	0.29	0.04	0.03	0	0.01	0	0	0.01	0	0.1	0.09
CXCL16	4.12	2.71	4.24	2.54	3.08	2.74	0.4	1.31	0.76	1.6	4.2	3.81
CXCL2	0	0.14	0.41	1.73	9.87	0.91	0.94	1.15	0.52	0.04	0	0.02
CXCL5	0	0.01	0.13	0.06	0.09	0.13	0.06	0.05	0.07	0.03	0	0
CXCR3	0.87	1.1	105.06	88.88	84.8	49.49	14.74	11.69	75.61	58.33	16.83	19.16
CXCR4	1814.36	2102.08	283.71	327.65	143.56	218.49	53.07	59.7	6.77	6.9	245.51	199.67
CXCR5	1.94	1.25	3.98	3.92	2.64	1.03	0.5	0.31	1.98	2.59	1.27	1.93
CXCR7	0.94	1.22	0	0	0.3	0.22	0.12	0.51	0.28	0.32	1.65	1.03
CYBA	92.93	109.93	45.65	51.71	17.54	21.53	16.08	25.23	33.16	49.87	66.18	81.83
CYLD	41.44	37.63	32.96	31.41	28.37	32.15	27.78	32.25	15.6	13.58	25.71	26.18
CYP27B1	0.51	0.05	3.13	1.78	10.14	8.83	7.1	3.83	10.14	8.1	4.8	3.51
CYSLTR1	25.14	22.77	58.51	40.7	57.88	60.71	48.97	50.16	4.82	4.71	38.44	27.1
DAP	57.67	50.33	56.2	48.69	51.16	38.65	54.5	44.46	58.24	35.47	74.92	61.87
DAXX	33.63	33.38	39.46	41.92	63.49	81.57	76.13	67.22	59.71	71.04	65.49	71.11
DCLRE1C	8.91	8.28	8.19	13.14	11.83	12.66	10.5	10.23	9.93	9.02	18.4	15.56
DDB1	30.79	28.46	36.94	43.15	114.45	118.51	131.54	127.79	130.45	125.46	84.05	94.05
DDIT3	96.9	95.4	276.72	313.13	198.52	351.59	105.9	94.44	30.78	33.11	237.02	128.66
DDR1	1.22	2.13	0.59	0.43	0.74	1.48	1.02	1.81	1.24	1.61	0.97	1.49
DDX3X	146.54	167.78	787.7	704.88	420.56	341.79	155.44	164.16	181.18	135.52	67.39	63.18
DET1	4.86	3.49	1.26	2.05	1.49	2.57	2.67	1.23	0.86	0.71	0.82	0.85
DHDH	2.29	1.87	1.18	0.47	0.02	0.21	0.03	0	0.46	0.21	5.27	4.77
DHX9	66.24	64.85	215.16	207.04	243.71	210.94	240.44	249.75	212.61	172.9	70.7	76.76
DKC1	17.59	19.47	77.07	75.62	245.3	233.04	172.09	164.04	220.94	251.21	80.94	95.78
DLC1	0.28	0.01	0.53	0.2	0.42	0.47	0.17	0.12	0.15	0	0.69	0.19
DOCK2	42.15	41.05	20.26	24.84	9.81	10.45	17.65	18	24.54	18.42	45.13	35.66
DPF2	21.29	29.87	42.54	57.98	48.84	56.94	47.72	47.95	40.7	45.2	86.64	72.89
DPP4	50.43	48.74	26.85	17.44	7.58	2.89	9.51	10.61	3	1.78	44.45	33.94
DPYD	19.22	21.26	16.38	15.4	5.25	6.14	1.98	2.75	2.28	1.51	13.94	14.09
DUSP1	1426.62	2559.17	714.96	484.14	86.97	59.33	14.91	14.2	9.77	1.38	10.39	8.45
DUSP10	14.56	13.51	33.21	22.42	7.5	8.55	7.25	9.74	8.77	11.29	26.51	29.37
DUSP16	2.76	2.89	5.11	6.33	1.62	3.49	1.7	2.1	1.22	1.62	5.26	3.95
DUSP19	0.55	0.17	0.09	0.21	0.18	0.35	0.22	0.51	1.13	0.94	1.06	1.52
DUSP2	253.28	330.95	2568.23	2318.11	2128.64	1343.56	735.97	567.75	477.26	72.99	172.09	119.69
DUSP22	17.8	12.19	11.03	10.02	21.03	16.89	21.16	14.05	14.28	12.23	18.86	15.74
DUSP4	0.1	0.11	12.46	31.91	36.64	35.48	33.77	26.41	36.66	44.71	83.88	83.53
DUSP6	8.72	11.61	16.37	7.86	49.43	8.68	12.37	7.12	11.61	8.49	11.99	9.14
DUSP8	0.76	0.45	5.52	4.98	1.49	1.43	0.44	0.46	0.04	0.02	0.19	0.02
DYRK1B	1.84	1.56	3.69	2.4	0.87	1.43	1.14	0.91	0.24	0.31	0.57	0.78
E2F1	0.24	0.12	0.49	0.22	0.12	0.08	0.47	0.14	11.05	9	9.95	12.45
E2F3	2.91	3.08	1.85	1.5	4.13	3.44	4.14	4.16	9.07	6.82	5.67	5.84
EBF1	0.07	0	0.06	0.07	0.15	0.37	0.14	0	0	0	0.1	0.08
ECSIT	29.55	34.9	24.46	26.09	24.48	26.81	35.21	31.56	32.66	49.01	40.09	39.71
EDN1	0.15	0.23	0.02	0.07	0.07	0	0	0.18	0.09	0.09	0	0
EEF2K	3.33	4.07	1.41	1.58	2.72	3.2	3.73	3.93	6.18	4.31	7.92	8.87
EFNA1	4.33	2.93	2.08	2.79	2.19	3.68	2.34	2.88	0.94	1.07	1.56	1.01
EGR1	22.35	30.37	1519.51	1308.6	463.89	396.83	87.56	75.39	31.57	26.59	16.13	20.6
EGR2	0.67	0.83	1526.31	1072.93	1257.58	936.47	326.34	302.04	127	99.35	33.11	32.26
EGR3	0.27	0.48	137.1	108.87	55.27	50.11	6.19	12.98	6.06	7.14	5.45	8.02
EI24	11.59	14.32	15.18	14.03	34.31	35.06	33.53	29.22	24.54	24.39	15.35	16.66
EIF2AK2	7.52	12.08	13.5	15.67	8.7	9.2	6.82	7.23	8.18	9.55	71.22	57.82
EIF4E	18.67	17.63	101.43	94.19	167.58	133.48	134.61	119.48	207.61	146.12	71.72	80.9
EIF4EBP1	7.92	14.3	1.75	0.98	95.28	118.39	115.16	109.21	89.6	97.1	239.2	233.31
ELF1	90.04	95.39	245.31	202.51	155.04	163.6	68.71	95.35	37.46	38.23	115.2	86.62
ELF3	0	0	0.18	0.01	0.04	0	0	0.11	0	0	0.01	0
ELK1	17.44	20.34	18.36	22.68	29.74	33.56	32.52	35.21	30.51	34.82	52.8	49.55
ELK4	5.65	7.96	11.52	12.05	13.32	12.92	10.38	12.66	9.36	5.77	3.53	3.37
ENC1	5.02	0.83	4.44	2.67	5.19	2.98	0.53	0.22	0.33	0.44	0.13	0.01
ENG	3.83	1.06	0.46	0.42	0.56	0.03	1.75	1.23	7.42	4.79	8.51	6.82
ENO2	24.29	41.65	59.43	65.78	58.93	53.94	33.03	36.79	49.19	56.39	209.93	198.12
ENTPD1	2.31	2.09	0.53	0.79	1.24	1.61	1.82	2.41	2.6	2.35	1.87	2.15
EP300	6.26	8.22	10.64	14.82	5.41	6.46	3.52	5.27	2.58	2.76	3.37	2.77
EPX	0.03	0.04	0	0	0	0	0	0	0	0	0	0.02
ERBB2	1.74	0.78	0.3	0.05	0.14	0.24	0.03	0.24	0.35	0.14	1.01	1.08
ERC1	3.59	4.32	3.61	3.39	2.93	3.49	2.17	1.86	1.2	1.37	1.51	1.57
ERGIC2	25.86	25.09	69.88	60.88	112.34	102.19	112.05	127.38	105.1	91.46	79.58	78.94
ERRFI1	0.76	0.68	5.89	5.17	9.94	8.54	3.29	5.46	2.41	4.08	1.11	0.84
ESR1	1.29	0.74	0.34	1.11	0.1	0.07	0.08	0.09	0.36	0.01	0.4	0.27
ETHE1	50.23	43.97	29.93	28.88	23.04	22.35	60.86	32.46	70.83	61.44	188.51	174.12
ETS1	116.72	128.98	33.31	26.39	14.81	31.73	30.39	38.99	29.91	18.8	52.8	50.33
F11R	7.67	6.04	14.81	8.51	9.5	5.63	7.59	3.28	3.68	2.96	24.74	14.46
F3	0.22	0.04	1.07	0.16	0.98	0	0.19	0.24	0.09	0.03	0	0.01
F8	0.63	2.05	0.45	0.17	0.16	0	0.21	0.43	1.12	0.56	8.91	5.6
FADD	10.47	10.87	44.57	42.71	37.01	37.12	47.9	35.77	32.42	40.52	33.2	38.37
FAF1	3.61	3.18	3.04	1.76	2.34	2.21	2.48	1.91	3.79	4.59	6.65	7.03
FANCC	2.5	2.78	0.52	1.17	1.04	3.15	2.24	2.96	5.36	5.16	5.87	4.73
FANCD2	8.11	5.72	4.53	4.59	3.57	3.1	1.92	3.55	23.37	19.16	35.29	38.96
FAS	4.08	5.1	8.02	7.36	10.76	8.55	42.4	20.82	11.96	7.61	57.7	37.73
FBL	166.36	188.42	174.5	197.13	420.7	409.59	335.26	340.57	330.56	440.45	359.17	379.37
FBXW11	9.24	14.79	22.88	26.41	28.83	25.99	16.27	19.1	24.38	19.84	23.27	23.21
FCAR	0.72	0.62	0.37	0.28	0.54	0.35	0.25	0.28	0.18	0.17	0.4	0.11
FCER1G	4.6	7.46	0.29	3.51	0.44	2.01	0	0.45	0.18	0.17	1.28	1.42
FCGR1A	0.1	0	0	0	0	0	0	0	0	0	0.89	0.32
FCGR2B	0	0	0.11	0.02	0.01	0	0.01	0	0	0	0	0
FCGR2C	0	0	0.13	0	0	0	0	0	0	0	0.01	0
FCGR3A	0.31	0.1	0	0	0	0	0	0	0	0	0	0
FCGRT	57.29	73.48	21.48	30.59	2.52	7.03	2.92	2.8	6.02	5.87	15.29	16.84
FCRL5	0	0	0	0	0	0	0	0	0	0	0	0
FGFR1	0.32	0.68	0.73	0.34	0.76	0.41	0.08	0.31	0.14	0.05	2.19	2.09
FGFR2	0.12	0.04	0.19	0.03	0.02	0.2	0.2	0.18	0.03	0.04	0.06	0.07
FGFR3	0	0	0.01	0.13	0	0.03	0	0	0	0.01	0.01	0
FGFR4	0.08	0.28	0.2	0.41	0.69	0.76	0.24	0.36	0.45	1.6	0.49	0.5
FKBP5	87.73	124.99	41.02	48.53	70.36	84.56	53.01	59.94	69.04	59.33	189.44	170.04
FLNA	23.7	36.17	24.84	44.74	33.04	53.24	25.84	19.56	23.01	16.69	25.68	31.02
FN1	0.01	0.03	0.03	0	0.06	0.05	0.16	0.14	0.03	0.04	0.11	0.14
FOS	2407.39	3376.43	3060.93	1642.82	502.93	305.17	30.56	18.65	2.88	3.47	9.31	5.81
FOXK2	3.93	4.39	5.56	11.29	7.75	10.72	7.37	7.56	4.36	5.13	3.15	4.34
FOXP3	0.39	0.77	0.02	0.51	0.54	0.78	0.62	1.25	0.38	1.02	43.16	33.02
FTH1	2614.08	1949.51	4857.21	6101.18	2609.17	3809	1069.89	1489.27	550.66	661.86	1732.37	1631.77
FUS	74.42	75.89	161.29	171.38	194.05	178.53	144.5	136.47	124.61	157.36	45.42	51.29
FUT3	0	0	0.36	0.11	0.22	0	0.04	0	0	0.03	0.08	0.13
FYN	29.2	25.64	50.29	58.56	113.9	83.8	29.06	27.73	19.49	22.92	40.42	41.45
FZD4	0.05	0	0.05	0.03	0	0.02	0.04	0.02	0.07	0.03	0.14	0.35
G3BP2	73.41	65.26	253.15	228.22	148.73	149.27	102.24	101.53	93.36	75.61	103.98	95.65
G6PD	7.74	12.34	2.35	2.66	6.76	6.16	23.77	18.4	13.81	19.11	15.35	21.09
GADD45A	14.31	13.12	159.16	154.12	132.7	96.35	39.96	36.22	11.68	6.92	11.66	7.82
GADD45B	163.56	139.38	320.75	190.26	245.13	109.79	96.89	38.03	33.02	19.32	99.26	50.55
GAS6	0.5	0.34	0.42	0.86	0.36	0.06	0.29	0	0.01	0.06	0.05	0.12
GATA3	17.48	24.93	12.22	14.21	9.5	11.17	6.72	5.58	3.14	3.33	12.46	13.34
GBP1	15.61	16.87	21.42	15.45	139.94	33.14	264.84	63.33	58.34	66.48	216.11	128.33
GCLC	1.47	1.62	2.31	1.4	3.46	2.46	2.43	2.67	2.14	1.9	2.35	2.1
GCLM	2.55	2.28	12.91	7.86	14.68	6.48	12.27	7.46	4.26	1.62	5.61	3.11
GLG1	65.26	72.68	23.31	23.15	20.86	26.7	20.68	19.72	9.86	12.28	22.86	21.97
GNB2L1	2863.76	3107.48	2174.86	2280.81	2446.26	2326.62	2569.54	2511.56	2489.98	2773.98	2779.64	2703.68
GNLY	4.24	6.96	2.54	0.43	0.98	0.53	0.63	0.74	0.33	0.29	1.01	1
GP1BA	0.1	0.35	0.03	0	0.18	0.1	0	0.14	0.1	0.09	0.01	0.02
GP5	0.61	1.03	0.03	0	0.02	0	0.02	0.01	0	0.11	0.08	0.03
GPR183	403.66	298.22	1003.01	1192.28	420.58	647.19	191.27	283.39	74.98	82.44	145.5	88.19
GSK3B	2.74	4.28	2.86	3.12	2.1	1.55	2.23	1.74	1.43	1.3	1.96	1.56
GSTP1	84.25	100.88	72.16	106.76	107.74	172.68	331.89	469.34	443.71	631.48	335.69	558.23
GTF2B	76.01	63.56	271.18	193.96	131.39	113.45	133.39	126.07	101.1	85.2	101.92	88.99
GUSB	32.57	27.3	20.32	17.31	15.44	23.61	20.7	20.12	21.02	19.91	56.22	59.43
GYPC	146.27	217.95	62.08	101.98	39.22	66.41	70.89	86.86	77.69	118.7	153.34	174.74
GYPE	0.34	0.03	0.21	0.6	0.12	0.07	0.73	0.08	0.28	0.36	0.73	0.77
GZMA	12.46	10.89	3.24	1.33	0.42	0.34	0.57	0.7	0	0.13	0.47	0.33
GZMB	0.71	0.36	5.99	2.41	41.68	10.79	56.83	7.12	52.25	24.54	510.39	301.96
GZMK	10.21	13.79	3.46	3.88	1.41	2.05	0.17	3.28	0.59	0.33	0.07	0.28
GZMM	64.08	75.17	37.41	37.73	23.05	21.91	11.44	16.45	32.57	45.99	31.29	35.39
H1F0	6.7	4.1	1.91	1.57	0.51	0.23	1.07	0.76	1.96	1.99	14.71	10.02
HBB	0.36	0.44	0	0.33	0.12	0	0.03	0.12	0.3	0.04	0.09	0.09
HBP1	95.87	95.82	538.05	436.82	292.89	232.16	70.32	58.35	9	6.19	51.34	33.76
HDAC1	110.68	140.65	46.48	47.09	43.34	59.33	110.39	129.2	182.6	197.72	181.05	218.85
HDAC2	8.77	9.37	21.41	21.62	85.8	65.49	70.89	68.62	92.39	71.2	33.35	35.32
HDAC3	48.84	49.45	25.53	25.21	26.73	30.77	55.48	48.86	61.03	58.86	80.95	84.59
HDAC6	16.25	13.05	10.28	9.52	3.78	4.45	10.66	10.61	10.47	7.95	19.47	18.96
HEXIM1	14.27	17.67	41.97	28.44	7.47	9.77	18.16	13.52	8.73	8.11	6.33	4.91
HLA-A	1980.75	2477.83	2303.92	3142.28	3275.6	5349.06	2532.43	3591.59	1255.83	1954.9	1928.1	2342.16
HLA-B	4068.08	3032.92	4452.01	3823.83	3635.95	3519.22	3121.97	2452.38	1904.78	1657.51	2395.65	1551.12
HLA-C	1021.19	3129.3	882.35	2367.27	730.65	2016.86	884.15	1520.37	510.08	1268.81	805.23	1144.25
HLA-DMA	16.23	12	15.49	6.08	4.22	3.52	3.21	2.75	5.84	4.8	29.3	27.59
HLA-DMB	4.64	5.11	1.25	0.06	0	0.05	0.14	0.1	1.01	1.33	1.8	3.4
HLA-DOA	1.85	0.85	0.86	0.66	0.36	0.44	0.05	0.26	0.26	0.03	0.69	0.23
HLA-DOB	0.84	0.87	1.52	0.46	1.17	0.76	2.87	0.12	0.92	1.26	0.98	0.97
HLA-DPA1	17.53	35.96	13.47	16.26	9.92	11.25	3.64	11.22	11.41	21.47	17.97	50.19
HLA-DPB1	7.23	8.82	4.65	7.98	5.59	5.26	0.21	0.56	0.24	0.82	3.39	4.22
HLA-DQA1	0	0.28	0	0.06	0	0	0	0	0	0.01	0.05	0.12
HLA-DQB1	0.95	1.56	1.9	0.06	4.47	2.22	2.03	0.86	2.76	0.41	7.33	2.15
HLA-DQB2	0	0.11	0	0.14	0.22	0.15	0	0	0	0	0.02	0.15
HLA-DRA	1.88	3.21	0	0.32	0.13	0.11	0	0	0.43	0.24	0.26	0.59
HLA-DRB5	0.33	0.13	0.25	0.3	1.68	1	0.13	0.58	0.37	0.25	15.98	13.69
HLA-E	1385.4	1888.51	828.43	947.24	1590.42	1515.8	1160.53	1121.33	535.9	758.42	561	536.03
HLA-F	374.66	333.43	207.61	193.42	194.15	232.21	353.88	337.27	215.67	206.31	177.7	172.94
HMGA1	44	48.63	260.26	253.46	383.87	382.68	283.44	210.69	221.24	267.84	189.41	206.87
HMGB1	156.79	167.55	144.16	163.44	122.01	144.63	200.59	177.66	354.45	286.01	285.11	388.35
HMGN1	219.31	253.5	139.1	115.74	215.26	214.89	411.28	383.89	535.1	425.57	335.75	408.95
HPS3	11.19	15.33	1.51	1.92	0.83	1.2	5.12	8	7.44	6.36	19.59	22.95
HPSE	2.2	2.32	2.09	1.66	0.9	1.12	1.61	0.95	2.26	1.24	6.82	5.93
HRAS	2.4	3.16	2.67	4.26	4.17	6.51	7.94	5.54	6.36	4.13	0.9	1.73
HRH2	2.54	3.19	4.25	5.21	5.68	4.72	7.34	5.85	3.69	3.58	7.6	3.28
HRH4	0.11	0.06	0.11	0.12	0.06	0.03	0.09	0.05	0.03	0	0.06	0.03
HSF1	40.48	45.63	43.76	46.78	55.63	66.95	44.58	40.23	33.65	55.37	32.85	38.43
HSP90AA1	176.51	192.87	561.27	589.74	531.36	493.45	1129.62	1061.7	1115.76	1186.53	340.52	395.27
HSP90AB1	435.97	543.7	1844.25	1955.23	3148.99	2802.36	3214.82	3004.76	2793	3009.41	1188.57	1343.87
HSP90B1	141.83	142.94	261.79	499.85	314.8	694.29	473.57	755.17	308.83	384.23	373.1	443.8
HSPA1A	5.07	7.26	11.51	12.81	40.56	42.4	159.81	117.74	71.86	90.82	47.7	48.87
HSPB1	42.23	35.52	21.13	15.19	11.92	19.83	68.34	93.76	52.31	69.87	86.08	91.5
ICAM1	1.38	1.83	3.25	3.66	11.68	3.87	31.24	10.43	24.98	25.08	44	33.86
ICAM2	123.66	145.65	154.17	159.31	187.94	222.74	120.67	131.17	138.35	145.83	100.79	117.97
ICAM3	194.17	202.72	97.34	117.47	37.09	41.35	11.98	20.13	33.92	47.1	116.88	127.77
ICAM4	0.34	0.29	0.19	0.07	0.03	0	0	0	0.04	0.16	0.02	0.41
ICOS	47.05	52.92	283.83	271.62	386.65	323.76	222.85	198.5	142.07	144.18	125.2	114.2
IER2	387.29	575.64	607.58	729.66	201.73	292.57	108.9	119.86	67.94	89.38	136.33	150.9
IER3	3.67	8.7	204.5	129.49	693.23	412.17	416.57	372.07	270.83	268.03	66.31	65.81
IFI16	37.43	36.94	67.44	61.91	134.92	108.97	126.42	94.63	99.76	108.45	456.81	371.94
IFI35	19.05	21.62	13.47	14.48	14.17	14.71	42.18	15.96	36.71	39.66	182.47	141.99
IFI44L	3.02	4.78	1.4	2.76	0.45	0.98	1.38	0.27	0.65	0.57	93.68	79.86
IFIT1	1.49	1.58	1.81	2.19	0.34	0.27	0.3	0.3	0.22	0.52	88.03	27.8
IFIT2	4.84	7.28	5.76	6.77	3.41	8.63	6.9	2.82	2.56	3.75	291.66	79.91
IFIT3	3.78	5.1	3.08	4.63	7.27	2.98	10.63	7	4.47	6.26	268.98	108.81
IFITM1	2024.49	2815.56	764.37	945.14	165.57	143.81	199.57	109.68	778.46	808.74	3488.55	3059.55
IFNAR1	11.08	11.13	14.01	13.15	20	26.27	19.78	19.55	10.31	10.49	17.12	14.92
IFNAR2	56.29	59.11	100.56	110.06	139.95	158.26	66.28	68.14	42.43	41.38	62.6	76.43
IFNG	0.25	0	8.75	1.23	25.88	1.05	10.61	14.27	32.55	22.22	22.28	14.07
IFNGR1	25.16	18.77	61.62	53.76	21.99	20.82	18.33	21.5	24.3	19.79	44.76	39.09
IGF1R	11.35	9.74	6.39	5.75	8.44	8.27	5.14	5.96	2.85	2.06	3.3	2.09
IGF2R	4	4.02	2.55	3.34	1.13	2.13	1.71	1.58	1.14	1.85	2.4	3.41
IGFBP3	0.7	2.41	1.3	1.7	0.25	0.29	0	0.11	0	0.06	0.14	0
IGJ	19.55	0	2.47	0.24	0.6	0	0	0	0	0	0.05	0
IGLL1	2.93	0.99	0.77	0.36	0.02	0	0	0.46	0.05	0	0.17	0.08
IGSF8	25.22	20.28	11.05	10.43	4.51	9.89	15.41	18.15	21.34	26.23	21.8	24.81
IKBKAP	8.75	8.27	11.92	15.01	11.79	11.64	15.13	11.98	17.6	18.5	12.81	15.26
IKBKB	17.44	16.78	10.36	11.76	18.86	18.68	11.5	12.6	8.14	7.64	16.64	15.95
IKBKE	24.15	20.4	5.18	6.7	2.45	4.21	10.38	11.5	4.4	5.99	13.87	13.28
IKBKG	13.02	11.99	13.74	13.64	22.07	22.94	23.89	22.21	15.66	18.06	13.02	15.22
IL10	1.48	0.97	4.79	1.8	7.77	3.17	1.8	1.01	3.29	2.38	0.38	0.69
IL10RA	61.22	79.92	47.23	59.12	10.62	17.85	2.8	3.54	1.1	1.13	63.35	45.98
IL10RB	25.54	25.24	12.95	21.85	16.92	23.22	16.05	16.48	18.05	20.4	53.3	49.08
IL11	0.52	0.48	0.35	0.68	0.35	0.17	0.14	0.09	0.06	0.16	0.07	0.06
IL11RA	28.39	26.38	15.2	9.9	3.66	2.34	2.55	3.36	1.84	2	7.99	4.98
IL12A	0.21	0.84	1.56	1.45	1.8	0.1	0.04	0.53	0.19	0.43	0	0
IL12RB1	20.95	28.08	10.67	18.67	8.23	11.37	3.73	4.39	6.92	10.12	12.99	14.96
IL12RB2	0.47	0.01	0.48	0.4	5.33	3.57	14.61	2.84	14.62	9.9	16.76	11.21
IL13RA1	0.33	0.28	0.18	0.33	0.15	0.21	0.11	0.1	0.04	0.08	0.08	0.13
IL15	0.85	0.37	0.25	0.4	0.37	0.16	3.14	1.64	0.42	0.5	1.29	1.21
IL15RA	4.71	3.22	24	17.47	72.92	33.38	74.16	40.27	35.32	43.57	48.11	39.62
IL16	79.06	87.92	12.07	12.37	10.23	26.21	53.77	64.71	51.19	64.32	61	57.26
IL17B	0	0	0	0	0.16	0	0.05	0.26	0	0	0	0
IL17D	0.48	0.34	0.23	0.53	0.09	0.16	0.18	0.17	0.08	0.14	0.11	0.01
IL17RA	6.3	8.71	6.57	10.94	8.85	10.21	3.4	2.5	1.07	1.92	1.79	2.38
IL17RB	0.14	0.47	0.09	0	0.07	0.31	0.46	0.09	0.15	0.13	0.16	0.06
IL17RC	2.14	3.32	3.25	2.42	1.2	1.4	0.58	0.74	0.04	0.69	0.38	0.24
IL17RD	1.05	1.13	0.82	0.98	0.6	0.72	0.52	0.6	0.16	0.29	0.39	0.43
IL17RE	0	0	0.01	0	0.03	0	0	0	0	0	0	0.07
IL18	0.58	0.13	0.22	0.2	0.15	0.07	0	0.12	0	0.08	0.59	0.63
IL18BP	11.11	21.29	7.77	13.06	4.17	6	1.23	1.27	0.83	3.12	1.52	1.13
IL18R1	1.59	1.51	2.72	1.53	10.15	7.39	9.79	6.69	6.04	6.48	37.16	31.79
IL18RAP	0.05	0.61	2.39	1.31	11.96	7.25	5.99	4.49	1.18	0.53	14.41	10.21
IL1R1	0.12	0.13	2.87	1.38	6.67	1.89	2.46	0.6	1.33	0.29	0.15	0.11
IL1RAP	1.86	1.99	6.83	6.72	9.87	3.81	1.21	2.57	0.95	1.2	7.64	6.83
IL2	0.07	0	79.86	26.13	1019.63	319.76	819.82	615.67	3549.23	2680.11	43.39	30.56
IL20	0.06	0	0.14	0.18	0.01	0.06	0	0	0.04	0	0	0
IL21R	10.47	13.07	112.94	198.92	255.39	248.92	126.8	126.34	88.7	94.54	73.21	59.72
IL23A	36.09	41.82	842.83	389.42	469.18	252.82	151.3	161.58	70.79	47.45	18.19	22.1
IL23R	0.28	0.34	0.03	0.23	0.22	0.96	0.32	0.31	0.43	0.49	0.09	0.06
IL24	1.59	1.07	1.3	1.44	1.78	0.8	0.02	0.5	11.69	25.62	0.55	0.59
IL27RA	50.17	51.5	67.29	78.54	86.49	127.86	93.22	97.03	51.43	78.14	44.61	61.83
IL2RA	6.39	5.14	17.35	15.64	92.09	112.04	370.76	380.15	281.19	271.94	720.34	741.64
IL2RB	3.4	4.57	21.9	26.14	25.78	21.39	16.57	18.03	21.98	16.7	65.3	65.3
IL2RG	318.1	448.69	334.07	339.65	705.46	990.46	497.12	544.37	216.62	283.94	584.13	584.65
IL32	468.32	787.37	122.88	196.11	227.49	268.88	382.62	461.92	470.39	722.94	1554.94	1841.86
IL36A	0.06	0	0.13	0.41	0.22	0.31	0	0	0	0	0	0
IL3RA	0.55	0.52	0.44	0.45	0.42	0.19	0.12	0.28	0	0.18	1.06	0.43
IL4R	37.7	29.84	29.8	45.93	51.89	54.92	49.7	57.44	18.73	16.16	31.42	26.12
IL6	0	0	0	0.08	0	0	0.49	0.06	0.13	0.15	0.04	0
IL6R	19.64	19.65	20.16	21.3	33.65	27.64	5.78	5.73	5.16	5.57	4.02	3.74
IL6ST	54.84	72.51	47.39	49.28	21.43	24.35	13.01	16.2	7.59	6.2	8.51	6.78
IL7R	427.03	489.78	401.86	408.74	855.09	728.91	103.22	84.22	13.76	14.64	12.18	15.08
IL9R	0.27	0.2	0.01	0.37	0.11	0.13	0.12	0.1	0.06	0.05	1.56	1.15
ILF2	148.65	120.08	466.92	447.07	725.13	597.71	769.14	705.16	868.89	756.77	355.72	389.47
ILF3	86.43	103.24	213.15	251.75	275.71	309.1	210.52	185.8	146.85	197.2	69.07	87.09
ING4	53.17	55.9	13.32	12.64	10.55	22.25	24.14	22.61	7.92	8.73	31.44	29.59
INSR	0.82	0.57	0.24	0.37	0.17	0.09	0.51	0.37	0.3	0.12	1.13	1.31
IQGAP2	4.79	4.81	3.25	3.45	2.64	2.07	1.41	1.66	4.05	3.23	5.14	4.87
IRAK1	5.14	7.37	8.6	12.62	15.01	16.58	17.62	13.43	13.65	17.15	10.71	11.12
IRAK1BP1	1.73	2.28	0.24	0	0.1	0.06	2.52	0.61	2.09	0.86	1.21	2.03
IRAK2	1.75	1.17	7.36	3.65	11.85	9.24	4.2	3.96	2.8	1.64	7.61	4.44
IRAK4	17.16	17.92	9.76	9.41	5.83	7.84	7.48	10.4	10.7	9.65	16.44	17.18
IRF1	65.65	122.71	109.58	132.46	364.66	134.59	294.32	166.08	117.34	160.89	66.82	60.39
IRF2	31.54	33.79	10.37	4.22	11.75	17.09	44.87	35.16	27.76	27.86	90.28	82.77
IRF3	31.91	45.4	15.57	22.69	11.63	17.93	28.83	24.42	33.05	44.21	28.08	40.71
IRF4	3.48	4.4	120	174.22	502.9	451.37	707.95	518.05	168.05	141.56	166.81	131.86
IRF5	0.03	0	0.07	0	0.06	0	0.08	0.37	0.6	0.48	15.77	20.96
IRF7	18.67	21.31	16.49	25.27	8.84	14.24	7.23	6.27	2.82	6.94	161.37	106.28
IRF8	2.12	2.61	30.07	43.15	240	123.13	285.64	151.42	1251.6	1432.49	549.79	455.39
IRF9	91.23	85.4	167.25	168.64	107.69	56.67	167.19	97.43	94.27	110.78	178.3	148.54
IRS1	0.49	0.85	0.12	0.32	0.15	0.22	0.33	0.11	0.25	0.21	0.16	0.21
IRS2	5.52	11.09	7.99	8.27	1.62	2.01	0.65	0.3	0.17	0.05	0.21	0.09
ISG15	69.13	111.97	119.93	132.16	61.48	53.95	51.37	50.26	38.81	54.69	1591.68	1004.95
ISG20	232.78	217.3	118.02	131.37	50.15	60.16	42.31	21.08	34.78	33.1	539.02	368.97
ITFG1	26.87	22.59	16.58	14.48	14.36	12.72	19.09	20.01	25.94	18.32	23.83	29.35
ITGA1	0.26	0.4	0.41	0.06	0.47	1.12	0.48	0.69	0.65	0.54	0.23	0.3
ITGA2	0.13	0.11	0.67	0.45	1.53	2.23	0.42	0.54	0.13	0.12	0.27	0.41
ITGA3	0.24	0.11	0.01	0.13	0.12	0.24	0.08	0.06	0.16	0.27	0.58	0.56
ITGA4	41.27	38.29	16.5	13.82	11.58	12.31	8.26	8.7	12.32	6.74	16.35	12.63
ITGA5	17.6	21.93	12.51	14.94	6.65	14.1	8.47	9.22	4.36	3.69	20.69	16.53
ITGA6	43.07	37.97	21.98	17.62	9.74	8.2	2.47	1.54	2.74	1.24	2.25	2
ITGAE	7.61	6.43	4	4.38	3.93	6.57	8.4	8.08	10.39	9.74	14.16	17.29
ITGAL	55.23	48.08	25.83	19.48	5.67	8.02	13.05	7.77	26.69	19.12	86.77	59.22
ITGAM	0.07	1.04	0.21	0.26	0.19	0.05	0.2	0	0.1	0.17	0.19	0.06
ITGAV	0.51	0.56	6.49	7.62	3.26	2.26	1	0.72	0.84	0.31	1.04	0.67
ITGAX	0.02	0.44	0.07	0.12	0.03	0.09	0.03	0.02	0	0	1.44	0.45
ITGB1	22.79	17.21	65.41	50.38	72.77	54.84	29.01	24.67	20.66	13.84	22.35	25.37
ITGB2	323.73	330.87	133.02	144.75	47.8	57.2	123.25	146.71	101.11	131.63	213.38	274.44
ITGB3BP	15.21	19.04	6.83	5.21	3.32	15.07	11.72	28.91	55.6	36.83	113.59	85.63
ITGB4	0.11	0.36	0.19	0.17	0.04	0.04	0.15	0	0.04	0.23	0.57	0.3
JAK1	135.53	163.02	71.88	109.85	63.63	107.98	107.93	99.77	33.38	29.27	96.1	72.4
JAK2	2.21	3.96	1.77	2.62	5.24	3.68	11.72	7.49	13.7	6.15	23.14	12.47
JAK3	87.08	97.53	27.84	33.57	15.91	18.4	41.4	40.05	43.97	43.69	47.69	50.46
JUN	180.79	244.77	206.66	217.27	37.37	35.79	7.95	6.81	1.33	1.5	9.59	9
JUNB	1961.55	2893.33	749.28	761.82	374.63	372.76	228.54	194.3	77	87.02	171.54	180.95
JUND	98.18	82.77	81.47	55.95	11.6	15.13	11.38	12.97	7.79	6.69	18.82	14.91
KCNK5	0.18	0.14	3.07	2.58	25.04	19.16	9.09	7.82	7	8.92	11.7	12.32
KCNQ1	7.93	6.6	3.79	4.78	0.47	0.39	0.3	0.07	0.38	1.04	2.23	2.02
KEL	0	0	0	0	0	0	0	0	0	0.1	0.04	0.01
KIR3DL2	0.14	2	0.73	4.09	0.37	0.68	0.33	0.02	0.55	1.26	0.38	1.87
KLRB1	20.88	6.14	11.4	5.33	4.51	4.01	1.22	1.59	0.1	1.08	0.77	0.49
KLRC1	0.09	0.49	0	0	0	0	0	0	0.05	0.08	0	0.1
KLRD1	1.53	1.23	1.17	2.17	1.28	2.22	1.12	1.25	0.41	0.48	0.5	0.57
KLRK1	4.24	8.57	2.19	9.51	2.41	8.75	0.62	4.17	0.12	1.77	1.48	2.59
KPNA2	43.84	40.43	242.8	284.66	314.77	278.39	298.13	262.37	218.09	235.84	251.48	289.66
KPNA3	11.17	12.97	14.75	14.34	53.88	45.43	40.16	43.51	47	38.51	15.09	22.1
KPNA4	4.83	5.9	17.93	14.88	20.82	15.49	11.21	11.52	11.24	7.7	4.27	4.29
KPNA6	18.37	20.79	32.95	30.89	42.3	40.32	32.39	28.44	26.53	26.76	23.96	21.05
KTN1	22.02	19.56	29.64	24.51	54.39	45.2	41.4	40.96	26.5	23.4	29.62	28.76
LAG3	0.28	0.7	0.02	0.21	0.24	0.01	0.39	0.41	3.91	4.21	21.62	31.37
LAIR1	44.75	36.14	17.69	17.67	4.97	5.61	3.14	3.09	4.33	4.92	9.48	8.71
LAIR2	0.64	1.17	0.21	1.7	0	0.23	0.15	0.59	2.54	3.26	19.04	46.05
LAMP1	7.04	8.54	8.81	11.84	10.63	9.15	7.36	5.74	3.11	0.81	1.37	1.63
LAMP2	17.52	20.96	12.5	12.29	18.95	20.14	29.57	34.25	26.51	18.65	32.1	30.06
LAMP3	1.67	4.86	3.76	8.28	26.45	37.07	16.59	17.61	11.68	17.49	56.53	45.21
LAX1	6.55	8.46	50.55	65.17	36.14	44.73	7.34	16.3	8.7	12.23	13.09	14.06
LCK	454.64	544.08	171.11	155.85	137.86	241.75	200.75	214.66	348.62	415.04	359.15	425.72
LCP2	74.99	82.44	45.88	52.95	110.75	136.86	70.13	118.68	40.47	37.66	44.83	52.37
LEAP2	2.21	1.36	2.21	1.3	5.49	2.77	2.98	3.58	4.65	3.68	2.13	1.47
LGALS3	1.87	1.11	0.4	0.12	0.8	1.4	0.74	0	1.98	1.27	25.88	14.73
LIG1	28.99	23.51	12.7	10.6	4.66	7.78	11.94	11.73	33.42	35.01	81.76	97.3
LIG4	1.96	1.1	7.5	6.82	9.56	10.17	9.77	10.54	11.07	4.37	2.93	2.58
LILRA6	0.04	0.04	0.04	0.04	0.1	0.13	0.06	0.04	0.02	0.05	0.02	0.08
LILRB1	0.08	0.02	0.09	0.04	0.11	0.07	0.03	0.01	0.01	0.02	0.01	0
LILRB3	1.63	1.8	1.04	1.16	1.03	1.24	0.51	1.02	0.27	0.44	0.59	0.47
LITAF	203.66	250.27	148.7	227.96	37.9	71.36	171.39	165.8	129.74	143.8	110.78	134.29
LRP1	0.55	0.51	0.22	0.74	0.16	0.03	0	0.09	0	0.01	0.28	0.25
LRPPRC	22.22	20.18	19.64	17.91	84.78	69.97	86.21	73.57	92.06	69.38	78.24	74.2
LTA	16.65	12.76	61.84	40.42	187.87	118.21	313.28	239.56	1548.71	1511.52	615.25	646.03
LTB	1112.3	1216.66	252.34	268.68	104.84	143.99	278.94	267.14	647.7	704.46	379.39	456.72
LTB4R	5.09	5.38	1.86	2.45	1.35	1.59	1.59	0.92	0.66	1.1	2.09	2.15
LTB4R2	1.74	1.08	0.78	0.38	0.33	0.78	0.16	0.17	0.15	0.05	0.43	0.19
LTBR	0.11	0	0.03	0.02	0.09	0.07	0.07	0	0.96	0.37	0.72	0.57
LY75	9.7	9.44	3.06	2.02	3.5	2.36	3.67	1.97	2.94	2.33	7.34	4.36
LY86	4.37	5.45	1.5	2.61	0.35	0.44	0.1	0.28	0.16	0.78	8.1	10.3
LY9	105.21	100.47	192.21	194.84	58.51	69.52	21.76	24.29	37.24	38.84	18.84	15.09
LY96	13.12	9.94	12.43	8.4	5.2	6.19	7.17	6.34	5.69	3.9	43	19.72
LYG2	0.03	0.21	0	0	0	0	0.03	0.34	0	0.14	0	0
LYL1	0.62	0.07	0.09	0	0	0.07	0	0	0.08	0.01	0.15	0.4
LYN	0.01	0	0.02	0	0	0.04	0	0	0.08	0	0.35	0.26
LYZ	6.17	6.59	6.18	7.74	4.12	4.95	2.68	2.82	0.99	1.59	1.69	2.26
MAP2K1	6.48	8.21	9.7	8.31	9.83	8.69	8.71	9.46	9.13	8.54	20.24	22.12
MAP2K2	11.07	13.48	7.68	7.29	4.32	7.11	11.69	9.43	5.76	8.42	10.88	8
MAP2K3	23.18	30	433.63	497.54	995.6	709.94	206.05	244.98	270.31	321.51	73.71	96.38
MAP2K4	4.68	5.41	10.12	13.12	12.35	12.9	11.87	12.54	7.45	8.99	11.01	11.8
MAP2K5	16.95	17.65	4.39	4.37	2.82	4.06	7.47	9.25	9.83	8.44	25.42	19.57
MAP2K6	16.01	16.15	2.85	3.1	0.63	0.55	0.43	0.3	0.39	0.39	1.59	3.39
MAP2K7	1.79	3.12	1	1.42	1.5	2.22	1.67	2.12	1.22	1.26	1.34	1.16
MAP3K1	22.4	24.57	18.17	17.46	6.15	9.55	5.54	7.03	4.14	3.74	7.23	5.59
MAP3K10	0.11	0.17	0.07	0.15	0.01	0.16	0.01	0.03	0.02	0.1	0.01	0.03
MAP3K11	10.86	11.97	10.17	12.57	11.69	13.34	16.05	11.07	8.87	11.31	7.85	8.32
MAP3K12	3.68	4.11	0.84	0.91	0.33	0.17	0.12	0.42	1.23	0.97	2.19	2.14
MAP3K13	9.66	10.58	25.01	25.38	15.38	16.73	10.54	13.74	13.78	16.47	11.02	15.31
MAP3K14	7.39	7.85	8.12	9.54	11.06	12	12.54	9.73	9.09	7.08	5.92	4.34
MAP3K2	5.57	5.15	37.56	36.51	15.32	11.08	7.81	9.05	6.55	3.28	5.33	4.13
MAP3K3	7	7.83	2.82	4.61	0.85	1.36	0.97	1.55	0.97	1.01	1.65	1.95
MAP3K4	6.66	5.46	7.03	4.19	5.56	5.6	6.41	8.31	10.87	6.14	3.66	3.95
MAP3K5	0.96	1.46	0.78	1.26	0.34	0.59	1.12	0.49	0.54	0.95	0.98	0.57
MAP3K7	11.05	13.96	16.41	16.75	18.59	18.43	20.09	23.81	24.95	16.87	21.63	22.22
MAP3K8	0.74	0.49	3.76	3.55	7.03	7.03	6.19	9.36	3.8	2.78	28.03	14.67
MAP3K9	0.45	0.47	0.63	1.49	0.5	0.66	0.57	0.35	0.21	0.4	0.68	0.69
MAP4K1	26.62	35.36	13.01	15.9	2.92	4.56	7.94	8.39	16.92	19.49	49.02	55.68
MAP4K2	33.16	33.21	10.7	12.29	1.91	4.57	6.73	8.86	13.79	12.31	30.63	32.6
MAP4K4	8.54	7.3	5.68	6.54	9.89	13.69	4.22	4.91	1.7	1.61	4.59	4.56
MAPK1	11.47	13.51	13.56	14.07	21.05	14.3	23.96	21.15	19.49	9.32	14.39	11.24
MAPK11	0.35	0.06	0.07	0.43	0.07	0.01	0.16	0	0.09	0.37	0.26	0.3
MAPK13	10.39	8.44	4.38	3.68	10.02	8.29	6.65	5.64	8.79	6.89	11.99	9.68
MAPK14	6.9	7.12	4.69	5.15	4.67	5.62	8.01	5.03	5.19	5.55	8.91	8.5
MAPK3	4.57	6	1.55	2.14	0.29	0.92	2.1	1.82	1.69	1.86	3.98	6.01
MAPK7	1.81	3.6	1.32	0.86	0.76	1.27	1.57	2.12	0.94	1.24	3.74	3.21
MAPK8	5.88	5.96	14.88	16.43	8.1	8.67	5.19	4.27	3.01	2.8	4.44	4.13
MAPK8IP3	4.54	5.6	5.79	6.44	4.1	5.69	2.45	2.02	1.2	1.44	1.3	1.7
MAPK9	3.96	3.11	2.02	1.19	1.74	0.98	3.73	3.02	3.67	3.18	3.72	4.11
MAPKAPK2	0.52	0.62	3.61	6.09	1.72	2.02	0.71	1.29	1.35	1.11	1.2	1.16
MAPKAPK3	28.92	34.9	11.33	14.17	78.97	71.85	70.41	65.48	113.73	124.17	109.21	129.49
MAPKAPK5	19.29	18.33	19.14	18.55	36.68	39.36	36.13	34.71	23.94	31.18	13.47	14.73
MARK2	1.71	2.54	1.46	2.29	2.01	3.08	1.41	1.56	0.23	0.8	0.91	1.4
MASP2	0.54	0.17	0.57	0.32	0.24	0.18	0.02	0.12	0.03	0.02	0	0.04
MBP	25.7	43.47	7.69	15.88	13.4	18.35	12.11	11.83	8	10.71	13.54	15.46
MCAM	0.12	0.08	0.44	0.47	0.14	0.56	0.67	0.35	0.67	0.61	3.26	3.89
MCC	0.31	0.71	0.41	0.44	0.2	0.63	0.3	0.4	0.24	0.46	0.38	0.6
MCM5	22.47	21.58	19.61	16.56	8.09	12.24	28.01	27.7	273.34	267.5	237.99	256.4
MCM7	47.2	43.46	28.29	33.47	26.15	55.42	66.98	72.72	433.02	493.21	385.81	458.99
MDM2	11.21	7.8	27.61	18.31	28.56	19.51	24	20	29.51	15.62	28.47	16.98
MEF2A	6.09	6.28	4.4	3.56	9.65	9.42	4.46	6.72	4.32	4.09	5.19	4.63
MEFV	0.83	0.92	0.41	1.54	0.68	0.62	0.53	0.45	0.21	0.26	0.29	0.24
MEN1	1.37	2.15	0.68	0.71	0.99	1.35	2.45	2.18	1.26	2.82	1.47	1.43
MET	0.04	0.02	0.01	0.01	0.02	0.02	0	0.02	0	0.01	0.01	0
MFI2	0.15	0.18	0.16	0.15	0	0.16	0	0	0.29	0.21	0.92	0.9
MICA	15.76	12.26	3.39	6.37	1.87	3.53	9.86	7.34	7.31	8.31	11.69	10.22
MICB	6.85	5.73	4.93	2.45	2.97	2.3	9.84	7.95	14.72	10.49	16.89	11.53
MIF	706.81	701.08	425.57	427.56	1391.09	1387.81	2789.67	2446.08	2939.47	3825.96	3838	4655.13
MKNK1	11.51	14.8	5.88	5.75	3.46	3.95	11.21	10.39	10.75	14.44	29.92	23.29
MKNK2	10.03	11.17	19.19	16.41	5.65	7.32	9.02	7.8	9.88	11.05	15.84	16.12
MR1	6.4	6.58	6.31	10.23	3.42	4.85	3.42	1.94	2.31	3.06	10.43	9.94
MRC2	0.34	0.21	0.1	0.14	0.11	0.05	0.2	0.09	0.21	0.08	0.81	0.83
MRE11A	4.92	5.69	2.79	2.35	4.81	4.36	8.59	7.71	11.3	10.36	16.58	18.18
MST1R	0.24	0.37	0.12	0.31	0.05	0.06	0	0.02	0.13	0	0.16	0.55
MT2A	155.47	238.09	268.67	417.01	291.59	377.39	671.38	629.28	499.78	652.82	567.62	711.8
MT3	1.03	0.86	0.73	2.51	0.93	0.14	0	0.32	0.28	0.4	56.78	60.68
MTHFR	2.95	2.26	1.84	2.09	0.9	2.4	3.14	3.44	1.25	2.05	1.91	1.42
MTIF2	19.58	14.62	6.81	6.61	11.06	11.79	22.36	22.71	49.59	48.85	40.35	38.37
MTPN	9.88	12.06	23.55	22.69	22.29	21.61	17.33	17.92	15.42	18.4	16.02	17.88
MUC1	0.48	0.15	0.12	0.12	0	0	0	0	0.64	0	3.33	2.44
MX1	19.2	26.12	39.62	106.73	10.33	18.41	8.13	9.66	4.27	14.74	822.52	600.78
MYB	3.96	4.49	6	15.03	10.37	27.1	15.39	20.45	2.54	2.96	13.78	13.77
MYC	106.17	137.51	1542.4	1074.19	1410.52	1014.35	575.25	566.73	464.39	495.56	419.82	405.63
MYD88	21.87	29.13	32.46	33.67	33.06	38.65	40.8	39.77	42.4	45.52	78.52	68.3
MYLK	0.32	0.02	0.05	0.02	0.18	0.1	0.15	0.29	0.08	0.22	0.16	0.17
NCAM1	0.08	0.01	0	0	0	0	0	0.02	0.16	0.02	0.05	0.05
NCF1	7.18	14.2	0.68	2.06	0.21	0.35	0.39	0.9	0.65	1.31	8.47	10.91
NCF2	4.27	0.13	0.99	0.28	1.14	0.05	0.58	0.12	0.43	0.48	14.32	10.55
NCF4	0.47	1.42	1.07	0.13	0	0	0	0	0	0.32	7.66	14
NCKAP1	0.14	0.52	0.46	0.55	0.69	0.65	0.29	1.45	1.09	0.7	0.17	0.47
NCOA1	6.32	5.91	3.25	3.62	2.64	3.63	3.07	2.31	2.56	2.39	2.6	2.32
NCOR2	0.83	1.33	1.2	2.08	1.26	1.64	1.2	1.03	0.43	0.98	0.81	0.57
NCR1	0	0	0	0	0.11	0	0	0	0	0	0	0
NCR3	9.96	6.78	2.98	2.88	0.37	0.69	0.44	0.45	12.78	10.29	101.08	64.02
NDUFS3	43.62	46.17	109.98	111.18	88.3	100.01	163.64	129.41	170.16	203.32	112.44	130.48
NFATC1	19.34	24.6	101.43	130.69	72.66	76.35	23.62	25.69	21.94	27.47	25.02	28.8
NFATC2	6.75	5.28	2.67	2.65	5.06	3.66	4.99	4.91	8.8	4.26	6.31	4.58
NFATC3	31.18	41.41	15.64	18.9	20	23.85	21.54	21.68	17.66	18.83	25.37	30.18
NFIL3	1.75	1.16	6.17	6.19	2.1	1.25	0.69	0.51	0.55	0.3	9.72	6.36
NFKB1	10.63	9.39	70.87	68.86	85.63	87.02	56.56	59.26	32.66	34.62	31.22	24
NFKB2	2.53	3.28	17.62	22.56	14.61	16.57	15.11	12.69	7.46	6.68	6.56	7.24
NFKBIA	1059.79	1503.34	1103	1070.82	1395	1481.24	1195.04	1185.89	568.42	525.01	244.83	266
NFKBIB	6.33	7.7	51.52	43.4	50.39	44.17	40	33.07	30.95	50.32	14.88	15.47
NFKBIE	0.86	1.91	6.27	8.02	7.8	11.73	9.56	6.53	5.46	6.89	3.32	3.32
NFKBIZ	72.89	82.91	85.11	74.48	44.19	49.12	26.72	27.65	6.33	6.85	20.51	12.89
NKIRAS1	2.73	2.11	7.56	6.15	7.09	4.41	10.07	7.9	13.35	11.35	5.11	3.2
NKIRAS2	8.1	11.29	23.03	27.39	27.73	25.93	22.26	17.33	14.39	22.66	15.87	16.07
NKRF	8.31	6.87	9.86	10.6	10.11	10.1	9.08	8.78	8.4	6.27	5.14	4.49
NOD2	0.09	0.17	0.1	0.14	0.05	0.1	0.37	0.25	0.48	0.44	2.99	4.18
NOS2	0	0	0	0.03	0	0	0	0	0.08	0	0.11	0.03
NOTCH1	3.53	4.96	4.89	6.42	3.94	5.69	4.92	5.43	5.82	7.06	4.21	3.81
NPM1	1256.96	1513.35	1777	1785.84	3362.45	2842.66	3701.63	3545.62	4613.08	4262.86	2622.82	2557.84
NPPA	0.16	0	0.52	0.62	0.36	0.21	0	0	0.25	0.08	0.15	0
NPTN	12.33	11.02	24.83	24.72	32.01	33.8	31.55	36.38	49.73	33.45	12.7	17.49
NQO1	2.17	1.59	1.28	1.19	1.74	1.61	2.08	3.06	1.41	2.46	10.97	12.24
NR3C1	15.79	14.9	39.33	51.55	74.98	63.42	20.2	18.06	8.25	7.66	21.58	14.23
NR4A2	69.27	74.22	1047.07	1085.23	706.06	604.18	68.19	66.16	20.66	44.4	39.34	47.23
NSMAF	14.59	10.78	19.32	19.82	62.29	60.46	35.32	39.57	25.96	24.07	26.05	31.7
NT5E	2.01	2.24	25.29	15.85	57.32	28.42	17.7	9.82	4.35	1.32	0.71	0.51
OPRM1	0	0.14	0	0	0	0.06	0.02	0	0	0	0.02	0
OXTR	0.02	0.01	0	0	0	0	0	0	0.28	0.05	0.27	0.1
PAFAH1B1	9.31	9.87	25.19	25.65	11.65	13.42	14.07	14.73	15.13	11.45	13.42	14.7
PAFAH1B2	25.02	23.41	40.38	35.21	40.49	31.51	54.86	53.74	58.43	45.46	39.67	33.88
PAFAH1B3	29.13	33.11	12.03	10.05	17.02	24.34	58.74	64.25	81.2	99.56	59.18	69.82
PAFAH2	3.92	5.83	1.53	2.96	1.61	4.67	4.99	4.4	5.59	6.54	5.01	5.88
PAK1	6.36	4.32	10.26	10.16	6.35	7.54	5.34	5.16	9.61	8.17	32.59	28.95
PAPOLA	61.03	78.1	84.07	77.2	110.04	107.74	115.67	109.63	99.65	74.52	56.86	61.5
PARP1	29.2	29.87	16.16	16.29	44.95	53.17	71.11	72.42	112.2	110.54	116.56	147.78
PAWR	0	0.14	0.33	0.1	1.05	0.46	1.72	1.01	0.86	0.22	0.6	0.7
PAX8	0.02	0	0.16	0	0	0.14	0.05	0	0.03	0	0.22	0
PCBD1	3	2.84	2.56	1.77	2.81	3.43	8.68	7.98	19.68	20.74	44.81	50.94
PCBD2	10.44	7.74	3.25	2.63	3.31	4.08	6.33	5.91	5.21	4.56	7.09	8.28
PCNA	30.41	44.36	60.86	52.79	40.16	49.79	111.56	98.87	734.83	480.09	579.9	618.52
PDCD1	0.27	0.39	22.45	29.44	22.98	26.08	5.33	4.32	30.62	43.43	30.66	34.74
PDCD1LG2	0.01	0	0.07	0	0	0	0	0	0.03	0.01	0.27	0.18
PDCD2	41.86	43.92	58.83	48.14	111.26	90.08	96.25	91.95	113.02	72.3	50.28	62.55
PDGFB	0.46	1.08	0.41	0	0.12	0	0.06	0.02	0.26	0	1.23	0.06
PEBP1	196.81	215.78	153.59	153.66	211.44	190.81	259.89	244.68	300.87	330.71	205.89	290.92
PERP	0.87	0.42	5.34	3.53	1.5	0.96	1.12	0.7	1.9	1.18	8.07	6.18
PF4	0.22	0.78	0.94	2.02	0.15	0.57	0.07	0.89	0	0	0	0
PFDN2	42.82	39.26	245.19	208.54	355.17	288.35	316.59	287.22	409.25	414.02	171.92	188.85
PGK1	276.77	286.37	686.36	717.24	1268.36	1059.21	1137.72	978.47	1048.05	1156.85	3243.49	2905.01
PGLYRP1	0	0.11	0	0.02	0.07	0.08	0	0	0.1	0.02	0.29	0
PGLYRP2	0.38	0.44	0.54	0.46	0.53	2.73	0.01	0.32	0.09	0.14	0.64	0.38
PIAS1	71.96	71.43	77.09	89.58	44.27	58.9	39.04	37.86	24.44	21.42	39.82	35.95
PIAS3	6.96	10.27	5.57	6.15	1.85	2.83	8.66	10.66	6.69	8.29	18.25	17.29
PIGR	0.37	0.29	0.3	0.31	0.2	0.27	0.12	0.21	0.05	0.32	0.17	0.12
PIK3CA	8.72	9.07	16.68	19.01	5.92	7.27	6.83	7.54	1.95	1.36	3.91	3.48
PIK3CG	4.94	5.43	15.67	10.58	5.01	3.21	3.37	2.84	1.84	1.7	8.76	5.41
PIK3R1	15.21	16.13	37.52	36.31	15.93	7.84	2	1.88	1.7	1.72	5.34	3.33
PIK3R2	1.16	1.06	0.65	0.45	0.68	0.77	1.33	1.61	1.16	1.59	1.03	0.93
PIK3R3	0.02	0	0.11	0	0.31	0.1	0.59	0.19	1.35	0.27	0.43	0.27
PILRA	0.97	0.14	0.91	1.2	0.21	0.63	0	0.81	0.14	0.26	0.07	0
PIM1	160.73	212.38	60.31	83.27	82.35	136.81	87.44	67.37	25.64	20.06	339.16	224.81
PKN1	37.31	40.48	14.16	14.12	8.49	14.98	11.95	9.93	9.79	16.18	24.79	21.48
PLAA	6.18	5.9	60.57	52.56	36.47	26.97	24.4	24.01	35.13	29.53	20.64	22.8
PLAUR	0.27	0.59	114.71	113.72	14.3	13.01	3.34	1.64	3.53	2.62	33.32	24.69
PLCB1	0.17	0.04	0.1	0.03	0.13	0.04	0.15	0.12	0.03	0.01	0.01	0.11
PLCB3	0.24	0.19	0.62	0.65	0.29	0.34	0.17	0.42	0.32	0.16	0.26	0.13
PLCD1	9.28	6.99	4.41	5.18	2.01	2.02	0.4	0.4	0.68	1.09	5.68	4.78
PLK3	54.67	53.83	207.55	224.85	165.98	176.24	96.53	90.9	65.19	59.83	14.24	19.74
PLXNC1	2	1.4	1.3	1.51	2.09	1.85	0.83	0.81	0.2	0.69	2.91	1.92
PMAIP1	16.47	28.62	101.56	103.42	233.84	178.62	117.4	105.36	82.15	78.53	174.28	105.3
PML	9.79	10.12	5.43	5.73	5.87	10.05	11.22	9.71	9.21	9.03	42.03	34.99
PNP	18.74	34.13	787.3	711	302.7	243.32	150.74	153.31	186.65	208.21	109.19	127.16
POLR1A	0.75	1.9	2.65	4.78	16.52	18.23	9.46	11.51	9.89	8.47	4.02	4.14
POLR1B	3.36	4.73	11.15	12.16	62.29	56.55	42.6	46.28	48.12	43.06	22.64	19.6
POLR1D	215.5	339.93	220.61	302.06	217.08	239.59	198.07	266.28	280.95	289.69	280.83	357.71
POLR1E	15.63	19.35	19.93	26.86	63.85	53.15	35.18	27.98	51.27	53.77	40.83	42.61
POLR2H	30.03	21.79	53.11	58.81	197.5	163.09	234	195.56	367.37	351.37	199.1	225.36
POLR2L	61.68	72.55	97.37	97.14	175.19	189.08	216.74	195.83	210.7	250.9	45.29	72.43
POM121	16.7	14.94	18.82	22.58	23.9	25.67	14.8	14.61	10.3	11.44	14.7	12.85
POMC	7.41	7.09	8.79	11.79	3.9	4.25	2.3	3.52	1.72	6.31	4.25	5.61
POU2AF1	0.72	0.52	5.87	4.88	38.64	26.36	5.52	5.02	2.04	1.79	2.83	2.72
POU2F1	1.83	1.36	0.89	1.59	0.57	0.77	1.55	1.76	0.65	0.82	2.29	2.13
PPARA	0.7	0.6	0.21	0.51	0.2	0.23	0.64	0.89	0.36	0.5	0.95	0.81
PPBP	1.53	2.66	0.43	1.3	0.1	0.83	0	0.5	0	0	0	0
PPIA	640.44	574.07	649.61	665.72	1607.1	1504.94	2165.25	2065.7	2357.85	2495.45	1987.39	2099.73
PPM1A	5.85	5.87	10.48	8.96	4.64	5.64	7.02	5.93	5.49	3.91	4.81	4.73
PPM1B	11.83	18.57	20.51	23.12	13.75	13.47	13.74	12.81	5.4	8.02	9.08	13.81
PPP1R13L	0.35	0.26	0.16	0.1	0.02	0.57	0.42	0.2	0.08	0.16	0.99	0.3
PPP3CA	6.01	9.65	7.58	9.83	5.96	7.68	3.63	4.46	2.05	1.69	4.5	4.93
PPP3CB	2.47	4.49	4.66	3.16	3.87	4.37	5.57	4.4	5.7	4.52	5.14	5.56
PPP3CC	56.98	62.32	30.63	28.65	16.08	14.5	19.22	14.68	16.89	16.93	25.54	20.62
PPP3R1	2.91	2.74	5.67	4.87	9.21	6.49	8.19	5.77	6.29	4.23	4.78	3.63
PPP4C	20.75	24.51	95.68	85.8	54.13	56.24	79.45	75.89	72.73	88.53	54.58	74.57
PPP5C	14.48	11.01	9.05	9.32	44.97	35.1	57.25	43.2	86.5	84.02	41.42	50.77
PPP6C	31.19	29.41	60.97	54.65	48.54	47.17	47.1	47.35	49.04	41.27	30.31	30.95
PRDX6	163.94	113.39	111.11	91.49	56.54	80.15	118.25	133.21	141.9	147.86	191.67	198.07
PRF1	3.6	4.43	8.75	3.33	2.3	2.02	0.18	0.08	0.51	1.43	34.13	49.64
PRKACA	1.09	0.64	0.56	0.59	0.16	0.21	0.76	0.91	0.76	0.64	0.92	1.08
PRKACB	67.89	84.17	73.17	49.78	32.38	59.73	42.47	45.03	14.66	11.03	29.71	28.39
PRKCA	11.92	12.09	5.36	5.27	2.33	1.96	2.44	3	6.7	7.23	10.36	10.85
PRKCD	3.22	2.52	13.02	8.42	12.53	8.69	12.43	7.48	6.72	1.07	12.3	9.76
PRMT1	69.49	73.75	53.31	52.85	284.15	296.05	524.9	504.49	606.81	735.98	157.07	214.94
PRNP	48.84	46.23	699.76	595.39	643.55	424.58	111.72	122.34	46.89	44.15	47.7	40.57
PRSS16	0.03	0	0.05	0	0	0	0	0	0.08	0.17	1.17	0.79
PSIP1	55.33	60.94	21.37	17.2	8.59	11.01	16.98	20.68	18.15	10.36	58.48	58.73
PSMB10	210.79	225.4	64.05	75.48	136.78	131.45	432.45	294	516.02	650.42	512.38	567.69
PSMB5	33.85	27.8	107.59	101.74	208.96	160.95	255.52	224.37	395.8	401.47	185.79	268.74
PSMB6	129.54	101.18	261.52	257.66	367.51	317.3	566.82	502.78	652.19	677.2	270.31	333.59
PSMB7	146.92	162.63	334.11	320.91	471.36	347.05	567.26	422.01	579.5	581.06	258.83	284.47
PSMB8	205.38	214.71	229.84	186.17	257.38	189.91	597.09	366.56	936.52	983.56	1026.27	1071.63
PSMB9	139.99	178.69	26.28	43.56	97.92	58.46	303.21	199.3	368.03	438.08	541.69	667.48
PSMC1	71.18	72.87	159.55	181.78	201.62	205.92	303.12	246.23	275.84	336.08	183.74	186.89
PSMC2	39.75	43.77	117.91	104.45	110.48	93.15	144.73	122.49	161.65	172.22	81.52	90.12
PSMC3	56.6	64.35	113.77	137.47	185.21	181.44	222.09	184.24	232.71	294.01	140.26	174.74
PSMD1	25.89	20.28	51.26	52.11	144.18	140.98	183.51	126.31	160.18	182.18	62.03	78.06
PSMD12	26.24	26.36	153.9	140.26	164.71	118.67	149.3	135.14	205.24	164.48	97.56	108.84
PSMD13	90.62	101.99	159.14	156.72	368.36	285.96	326.93	275.95	410.85	450.73	252.62	280.61
PSMD3	26.77	33.45	38.63	39.4	68.96	68.73	106.28	85.09	89.36	129.48	44.49	62.75
PSMD7	88.8	87.91	178.51	185.43	238.3	229.7	284.92	247.61	253.96	320.8	131.69	167.68
PSME1	631.69	701.35	275.21	298.47	273.73	272.47	1207.04	892.53	1617.7	1479.93	1083.47	1151.08
PSME2	215.12	239.54	120.53	113.98	378.64	338.49	1305.11	784.56	1384.6	1417.17	774.33	1006.19
PSME3	27.79	29.16	97.61	97.41	254.85	221.92	197.89	172.3	206.93	213.49	40.47	55.35
PSMF1	45.91	48.81	49.08	42.93	95.9	84.46	94.41	85.03	88.65	92.25	58.37	53.93
PSTPIP1	40.74	53.13	13.28	22.39	5.41	6.32	6.28	8.69	22.26	28.28	55.9	49.56
PTAFR	0.48	0.35	0.89	0.21	0.57	0.78	0.3	0.43	0.31	0.62	0.2	0.12
PTGES	0.03	0.13	0.12	0.11	0.02	0.04	0	0.01	0.12	0.18	0.83	0.9
PTGFRN	0.12	0.31	0.48	0.73	0.72	0.84	1.51	3.28	4.86	4.63	2.38	2.37
PTGIS	0.42	0.3	0.32	0.32	0.25	0.33	0.36	0.15	0.12	0.12	0.11	0.09
PTK2	4.18	5.14	7.54	8.19	39.46	47.1	15.67	13.66	15.1	10.12	7.08	6.82
PTK2B	37.66	54.67	17.46	25.57	23.63	35.26	14.5	17.69	29.58	35.21	69.86	65.02
PTMA	1654.4	1868.35	1843.22	2026.44	2571.29	2887.28	2788.39	2779.54	2545.02	3221.6	2093.63	2391.35
PTPN1	44.01	49.58	128.08	120.1	66.54	51.21	34.69	25.1	21.54	21.82	85.73	71.5
PTPN11	9.42	12.61	20.46	21.97	40.44	31.87	31.57	31.66	39.29	30.67	15.74	16.88
PTPN22	13.2	12.02	156.94	141.74	416.73	295.94	80.13	79.29	52.09	35.08	52.97	46.61
PTPN6	82.7	93.17	98.06	131.79	323.65	339.46	309.14	268.72	364.82	391.69	291.22	345.75
PTPRC	281.07	330.71	156.07	131.62	298.53	365.86	184.78	298.19	115.6	101.97	316.44	335.6
PTPRCAP	483.29	570.52	179.77	200.61	38.17	86.06	64.75	114.91	224.15	277.18	294.1	329.53
PTPRJ	3.72	4.41	2.19	3.34	2.95	7.12	3.47	4.3	0.5	0.51	1.66	2.24
PTX3	0	0	0	0	0	0	0	0	0	0	0	0.08
PVR	1.02	0.43	0.33	0.67	2.07	1.13	2.83	2.88	5.03	3.22	4.13	2.45
RAC1	32.25	47.24	35.46	47.97	25.41	21.75	64.74	42.82	39.07	11.94	36.72	21.57
RAC2	439.77	501.73	237.45	280.89	312.08	376.94	397.11	404.18	456.29	574.52	992.05	1057.86
RACGAP1	1.43	1.74	2.64	1.35	5.49	3.6	5.54	4.03	8.96	4.66	43.8	35.6
RAF1	60.89	53.94	122.83	134.85	117.54	109.38	70.88	76.62	80.85	75.49	68.64	56.52
RALBP1	7.24	6.9	2.42	3	3.52	4.09	6.78	6.55	5.89	5.18	11.06	12.91
RAP1A	18.89	31.76	45.83	40.95	63.89	53.02	75.46	75.33	44.4	37.29	55.57	61.88
RAP1B	181.71	189.74	475.65	352.06	481.35	338.09	287.34	257.13	250.91	193.83	280.4	247.66
RAPGEF1	3.11	4.53	2.51	3.69	3.96	5.83	5.92	5.5	3.79	3.48	4.76	3.76
RARB	0.05	0.22	0.02	0.12	0.15	0.09	0.15	0.29	0	0.05	0.02	0.01
RARG	3.79	5.73	10.61	10.41	3.88	4.73	16.3	20.05	22.18	17.76	8.83	10.9
RB1	7.13	9.44	6.69	6.71	9.5	8.79	11.44	10.2	13.81	7.21	17.05	15.68
RBP1	0.18	0.4	0.06	0.33	0.06	0.31	0.15	0.2	0	0	0.2	0
RBX1	68.43	58.84	112.27	104.11	170.81	167.92	243.62	238.38	372.01	323.77	319.12	310.04
REL	13.51	12.91	286.35	327.84	440.54	331.86	100.81	116.74	68.21	67.81	39.1	35.86
RELA	37.97	39.94	85.9	108.98	62.1	70.54	55.29	49.26	29.85	33.91	39.47	27.42
RELB	4.89	4.08	92.38	96.63	82.25	75.71	54.07	42.9	13.14	16.63	10.61	8.84
REPS2	0.1	0.14	0.16	0.14	0.06	0.27	0.11	0.05	0.02	0.04	0.07	0.06
REV3L	3.05	3.2	3.39	3.85	4.08	4.18	2.6	3.12	2.33	1.64	1.94	1.68
RFWD2	8.7	8.13	8.29	13.12	9.55	11.65	12.42	13.84	12.72	7.65	14.37	11.35
RFX1	0.5	0.87	1.91	2.36	0.91	1.02	0.3	0.46	0.16	0.41	0.41	0.56
RFX5	16.94	15.59	23.7	19.08	36.68	43.03	30.76	32.36	19.25	19.32	32.26	31.97
RFXANK	16.81	20.4	7.34	9.48	9.2	12.36	40.28	26.22	45.3	55.89	34.09	38.17
RFXAP	0.94	0.69	0.99	0.6	0.43	0.65	0.27	0.34	1.09	0.72	1.65	1.16
RHCE	0.34	0.13	0.15	0.47	0.07	0	0.06	0	0	0.08	0.55	0.42
RHD	0.98	1.04	0.36	0.57	0.41	0.42	0.17	0.23	0.05	0.05	0.14	0.12
RIPK1	6.67	7.04	10.95	12.86	8.71	7.84	4.54	3.54	2.86	3.31	7.84	6.46
RIPK2	18.84	12.42	33.97	20.68	20.83	9.44	39.38	21.89	21.92	25.13	24.01	26.25
RIPK3	6.15	6.81	1.89	2.6	1.2	2.07	4.65	3.31	4.04	4.48	5.92	5.4
RNF11	9.45	9.42	38.99	35.42	24.62	17.83	12.99	14.07	9.33	6.62	7.81	5.62
RNF138	72.55	69.28	92.89	73.93	73.08	53.41	52.27	50.24	83.37	56.89	62.68	52.34
RNF25	12.86	14.23	36.14	43.34	25.34	25.51	27.3	24.53	23.02	23.95	11.91	13.35
RNH1	90.34	82.69	183.05	237.4	282.71	250.54	242.37	234.3	183.05	221.79	113.75	131.88
RPL30	10677.05	8901.15	7037.34	6756.32	4701.17	5141.82	3807.27	4538.84	3517.49	3205.56	3128.55	2837.01
RPL4	4351.64	4763.35	3596.13	4014.04	3562.64	3831.77	3328.51	3704.75	3254.12	3710.91	3839.59	3885.19
RPL6	3514.77	4007.25	2880.37	3265.9	3026.86	3303.46	3556.67	3599.6	2962.61	3351.16	2486.56	2805.48
RPL8	3721.77	3614.33	3007.9	3140.71	3637.06	3148.18	3676.5	3148.57	3493.17	3638.16	3247.5	3409.64
RPS11	3585.12	3634.2	2482.53	2770.24	2127.72	2620.96	2505.56	2788.14	2726.5	3063.7	2818.28	2809.91
RPS13	7390.03	7348.02	6060.59	6209.01	5512.31	5583.1	5165.5	5527.35	5586.64	5294.4	4247.01	4332.19
RPS6KA2	1.56	0.76	0.36	0.3	0.18	0.44	0.95	0.94	0.4	0.2	2.1	1.68
RPS6KA5	10.28	9.14	31.82	31.56	9.86	13.38	9.38	8.75	4.5	4.7	10.72	8.54
RPS6KB1	13.89	14.14	39.19	38.79	40.44	37.57	27.39	23.53	16.15	15.2	13.91	13.9
RSF1	16.53	17.2	12.88	12.97	12.04	14.74	15.92	15.66	5.55	6.28	8.89	8.39
RTN4	19.37	29.93	46.77	47.75	8.88	10.47	7.31	7.51	9.33	8.9	16.02	19.59
RXRA	0.55	0.34	2.25	2.53	0.52	0.29	0.14	0.14	1.5	1.12	3.73	2.61
S100A10	230.52	226.51	203.97	135.14	240.73	132.67	56.28	54.14	80.59	85.82	430.61	373.12
S100A6	544.11	479.9	217.18	214.14	158.42	135.29	266.94	127.8	292.23	207.52	435.41	463.1
SCARB1	0.63	0.82	0.76	1.07	2.05	2.32	5.22	3.88	9.76	11.89	9.18	10.88
SCARB2	7.63	9.55	6.27	5.62	1.51	1.26	1.4	0.83	1.13	0.68	3.55	2.25
SCNN1A	0.31	1.01	0.29	0.12	0	0	0	0	0.01	0	0.3	0
SDF2	22.68	19.66	86.96	60.38	63.95	61.29	56.96	66.13	58.22	49.1	40.36	40.85
SDF2L1	33.29	38.28	45.87	82.89	122.17	225.08	223.9	194.75	151.44	174.16	36.97	42.42
SELE	0	0	0	0	0	0.17	0	0	0	0	0	0
SELL	831.85	895.66	204.45	142.3	675.26	696.65	854.67	1008.38	159.44	220.51	255.27	278.53
SELP	0.37	0.22	0.45	0.21	1.63	1.18	0.56	0.93	0.15	0.19	0.23	0.14
SELPLG	156.87	254.23	53.51	62.9	68.45	49.13	6.64	7.52	10.17	13.62	42.19	46.33
SEMA4D	74.57	70.1	54.21	53.53	248.35	230.21	124.35	135.47	72.03	64.44	23.66	22.5
SERPINB1	68.47	66.86	35.62	33.33	10.18	15.14	6.5	11.39	5.91	9.05	126.93	117.76
SESN1	44.44	114.08	32.06	34.15	19.64	53.33	37.34	61.07	8.71	6.19	51.98	61.69
SFTPB	0.02	0	0.2	0.05	0.03	0.01	0.02	0.02	0.01	0	0.08	0.03
SH2D1A	16.84	19.81	38.99	32.6	23.35	24.91	18.55	26.16	18.64	17.97	35.05	48.42
SH2D2A	5.65	6.12	233.47	200.34	228.99	198.88	68.32	50.22	81.73	76.43	106.3	110.46
SH3BGRL	117.35	121.78	64.28	45.14	15.49	15.21	19.38	27.42	36.88	26.32	117.03	106.25
SIGIRR	116.06	125.74	70.11	79.6	22.5	20.79	4.95	6.29	11.99	15.95	21	25.78
SIRT1	4.55	6.17	16.3	13.74	4.2	5.55	2.18	4.01	1.86	0.95	6.91	6.72
SIVA1	222.81	198.92	253.03	305.09	87.23	118.58	187.63	163.29	348.89	343.3	170.25	226.17
SLAMF1	11.09	6.13	540.3	400.65	624.92	394.01	59.48	69.47	55.79	47.02	78.58	63.27
SLAMF6	29.36	28.41	11.27	11.89	62.25	77.53	49.21	59.05	34.51	36.27	61.67	57.64
SLAMF7	0.86	0.46	0.39	1.13	1.14	1.3	9.52	5.88	42.47	28.87	48.44	15.51
SLC11A2	21.55	19.09	23.66	21.33	24.59	29.4	24.94	23.36	13.08	13.04	17.87	13.85
SLC3A2	141.39	154.13	304.23	363.36	1445.8	1314.87	511.51	424.18	288.9	352.93	279.03	240.17
SLC44A1	5.71	5.42	3.16	2	0.65	1.44	1.92	3.57	3.76	2	7.7	4.92
SLC4A1	0.04	0.04	0.07	0.18	0.07	0.06	0.05	0.09	0.01	0.03	0.01	0
SLC6A6	2.94	4.43	11.83	12.18	22.27	14.87	10.76	9.3	9.92	7.16	8.03	6.48
SLC7A5	1.47	0.63	118.72	115.15	342.99	226.21	54.83	51.01	52.87	48.05	31.43	25.2
SMARCA4	9.6	9.83	7.24	10.25	27.21	27.03	20.14	15.41	9.93	17.96	8.08	9.98
SMARCAL1	15.73	10.52	3.11	1.65	7.5	8.79	19.84	20.91	17.33	18.01	27	26.25
SMARCB1	29.66	39.11	46.08	53.93	23.22	31.96	54.25	54.73	49.04	69.61	53.28	67.62
SMARCC1	12.13	13.18	6.62	8.18	12.94	14.95	17.3	16	16.01	13.06	12.35	12.28
SMARCC2	16.14	16.51	10.66	10.76	9.85	14.28	13.84	13.84	6.74	8.32	11.22	12.48
SMARCE1	60.45	75.18	84.94	92.46	79.38	87.92	121.05	124.87	117.5	110.34	102.18	122.19
SOCS1	14.41	19.28	20.43	20.7	14.67	13.82	19.06	14.19	15.11	8.69	25.39	27.85
SOCS2	19.09	17.9	16.07	22.15	11.06	9.5	4.99	8	4.89	3.65	151.25	156.42
SOCS3	45	82	20.56	22.16	24.26	9.87	12.36	3.6	3.87	4.44	23.23	15.98
SOCS4	1.49	1.97	12.88	10.23	13.02	9.44	5.68	5.8	7.79	6.02	3.39	3.11
SOCS5	3.89	5.61	9.9	11.49	5.02	5.38	3.07	5.55	2.91	2.14	2.38	1.77
SOD1	477.23	497.57	580.12	577.27	660.33	624.8	955.94	971.69	914.53	905.82	602.56	714.63
SOD2	117.35	115	281.32	214.47	138.43	85.93	140.41	89.43	117.73	113.38	72.68	63.74
SOS1	2.64	2.8	2.14	2.02	4.2	4.19	3.39	3.51	1.35	1.33	5	3.88
SP1	4.11	5.07	2.88	5.18	4.71	5.85	6	5.68	4.12	4.02	7.37	5.81
SPAG9	1.89	2.5	21.16	19.8	27.17	20.83	5.54	5.18	2.64	2.13	4.38	3.5
SPN	12.19	15.49	5.68	7.85	5.89	8.54	4.19	6.27	4.91	8.19	21.49	25.81
SQSTM1	55.85	55.62	132.62	170.64	76.27	118.1	147.74	139.66	58.6	73.58	169.84	141.69
SRC	0.69	0.23	0.57	0.66	1.6	1.27	0.79	0.29	0.72	0.73	1.41	1.13
SRF	0.97	0.78	5.45	3.41	6.83	6.44	3.8	3.84	3.38	3.02	2.29	1.87
ST6GAL1	81.53	86.48	23.36	27.57	66.32	82.78	53.87	66.04	54.96	49.29	76.14	60.13
ST8SIA1	0.37	0.24	0.15	0.32	0.21	0.22	0.18	0.15	0.07	0.14	0.12	0.08
STAT1	90.54	126.98	51.78	65.88	263.39	89.57	634.11	384.08	356.68	377.84	1370.69	1059.45
STAT2	26.47	29.45	8.62	9.49	9.22	11.28	27.21	17.35	10.65	11.15	98.92	60.26
STAT3	44.8	62.42	96.06	123.39	92.31	72.77	97.32	61.74	79.01	101.29	262.33	217.17
STAT4	61.04	56.29	91.71	111.46	137.3	107.05	77.03	70.03	75.65	109.77	237.71	197.29
STAT5A	20.6	24.73	23.67	37.8	69.37	80.06	92.61	97.14	33.27	35.34	57.05	60.12
STAT5B	21.9	28.07	13.48	15.35	27.42	33.86	27.63	35.29	11.75	9.95	25.83	23.62
STAT6	55.59	63.11	41.42	53.31	144.44	162.04	135.62	125.57	100.42	112.81	57.81	52.72
STRN4	4.21	5.73	8.32	12.96	12.65	12.16	8.4	7.57	5.93	4.42	5.94	4.73
SUMO1	97.55	90.11	185.49	166.23	185.3	175.55	240.68	226.48	234.41	197.22	222.62	218.53
SYK	0.23	0.25	0.22	0.16	0.12	0.14	0.01	0.12	0.04	0.05	0.31	0.12
TACR1	0	0	0	0.13	0	0	0.08	0.14	0.17	0	0	0
TAF4B	6.8	6.48	15.66	15.24	32.57	22.99	18.14	13.4	12.47	9.75	12.05	7.78
TANK	32.75	31.07	55.99	45.05	80.86	97.94	91.77	98.77	57.72	43.14	66.54	58.77
TAOK2	3.07	3.88	2.21	1.65	1.95	2.7	2.75	2.24	2.11	2.79	2.72	3.03
TAP1	83.35	93.62	73.74	67.46	444.88	127.37	662.34	336.63	544.58	648.72	530.51	409.24
TAP2	12.52	13.47	8.91	8.66	14.98	10.53	33.52	19.07	28.73	34.68	19.06	17.52
TAPBP	201.84	255.91	150.97	158.8	243.03	218.54	371.15	243.6	215.54	189.83	212.32	174.11
TBK1	2.57	1.9	5.67	2.29	4.05	2.25	8.51	4.37	22.8	14	24.22	22.55
TBKBP1	0.09	0.07	0.14	0.02	5.02	0.33	4.12	0.55	3.08	2.96	1.2	0.52
TBP	6.83	7.22	19.69	20.03	20.47	25.62	22.79	19.59	19.75	23.8	12.6	13.85
TBX21	0	0.09	0.98	0.7	28.1	3.93	23.28	3.86	18.68	16.62	6.34	5.13
TCF3	7.2	9.9	5.73	4.62	10.58	11.01	9.28	8.91	7.85	8.6	5.98	8.9
TCF7	210.9	260.41	83.35	94.47	60.86	87.65	36.43	46.24	30.1	25.83	20	20.49
TCIRG1	107.47	83.96	42.47	33.22	13.79	14.89	23.14	19.98	22.8	24.79	59.57	55.99
TCN2	0.27	0.45	0.26	0.33	0.03	0	0	0	0	0.12	0	0.28
TDP2	20.54	20.98	53.3	31.84	29.88	25.68	55.92	49.25	59.24	48.94	48.38	42.48
TERT	0.14	0.12	0.1	0.02	0.24	0.11	1.05	0.66	1.61	1.85	0.62	0.81
TFG	31.22	35.84	96.46	82.37	123.45	105.32	117.07	101.98	79.19	73.31	173.69	152.16
TFRC	13.12	14.22	70.7	73.49	161.28	145.62	95.62	112.76	191.13	119.01	128.39	141.42
TGFA	0.6	0.84	0.72	0.79	0.44	0.28	0.13	0.68	0.19	0.13	0.13	0.04
THBS1	0.01	0.01	0.12	0.24	0.41	0.55	0	0	0.14	0.18	0.06	0.01
TICAM1	2.88	2.82	4.7	5.63	10.73	14.58	10.09	8.94	6.61	7.15	6.06	6.27
TICAM2	0.21	0	0.41	0	0.45	0.58	0	0	0	0	0.81	0.21
TIFA	5.65	5.26	5.9	3.29	12.18	11.2	29.42	21.05	25.88	16.57	46.2	39.76
TIMP1	42.18	48.17	28.06	33.17	14.73	17.62	1.12	2.27	2.59	3.47	11.54	15.43
TIRAP	2.46	1.06	1.62	1.23	0.3	0.38	0.52	1.17	1.5	1.46	3.01	2.4
TLE1	0.12	0.05	0.32	0.4	0.12	0.08	0	0	0	0	0.12	0
TLR1	9.16	7.16	3.28	2.03	1.29	0.72	0.34	1.91	0.38	0.28	1.82	1.65
TLR2	1.1	1.84	2.68	1.46	2.2	1.83	2.75	3.76	0.82	1.27	1	0.34
TLR3	0.21	0.2	0.11	0.27	0	0	0	0.14	0	0	0	0
TLR5	1.1	2.74	1.03	0.67	1.19	0.71	0.43	0.14	0.07	0.01	0.32	0.07
TLR9	0.68	1.08	0.04	0.19	0.06	0.14	0.38	0.1	0.17	0.25	0.71	0.33
TNF	6.08	15.9	695.95	579.46	699.81	546	460.17	411.53	1178.07	1454.89	127.9	155.68
TNFAIP3	668.39	833.45	594.33	521.79	263.24	296.8	204.28	219.04	98.7	66.33	165.83	102.4
TNFRSF10A	17.37	32.77	26.45	28.66	61.68	52.95	24.28	19.59	10.38	15.9	5.22	7.09
TNFRSF10B	22.08	22.02	38.22	40.33	85.77	75.14	43.52	34.13	30.61	17.38	43.94	26.92
TNFRSF10C	0.02	0.1	0	0	0.16	0	0	0	0.06	0.1	0.11	0
TNFRSF10D	15.06	21.93	27.29	26.54	13.57	12.1	4.06	4.6	4.03	3.77	5.21	3.28
TNFRSF13B	0.11	0	0.25	0	0	0	0	0	0	0	0	0
TNFRSF13C	0.11	0.41	0.08	0.46	0.25	0.43	0.19	0	0.03	0	0	0
TNFRSF14	132.03	132.71	61.13	66.4	28.37	52.52	94.32	94.47	69.69	78.85	73.49	56.48
TNFRSF17	0.97	0	0	0	0.45	0	0	0	0	0.07	0	0
TNFRSF18	0.34	1.41	4.27	4.69	40.32	42.37	109.44	129.03	94.03	120.75	148.29	167.54
TNFRSF1A	9.73	14.79	17.78	38.99	16.26	27.39	19.73	13.27	13.96	18.48	20.33	27.22
TNFRSF1B	16.55	24.58	208.5	271.17	280.63	200.66	77.52	64.79	57.77	75.48	97.73	120.68
TNFRSF4	2.84	1.26	7.11	11.3	117.3	129.48	675.25	855.19	460.81	603.59	141.23	194.07
TNFRSF9	0.35	0.18	1.93	4.17	66.26	111.77	65.98	107.96	25.17	48.71	26.42	34.13
TNFSF10	23.98	32.43	12.83	9.98	16.94	10.26	20.56	11.36	37.03	48.89	295.9	243.49
TNFSF12	7.76	5.96	1.52	1.37	0.33	0.42	0.81	1.44	1.79	1.72	6.03	3.94
TNFSF13	0.79	1.61	1.78	1.69	1.74	0.72	0.85	1.3	1.32	1.68	9.38	4.82
TNFSF13B	1.5	1.27	0.34	0.18	0.65	0.63	5.56	2.53	3.28	5.74	17.49	17.19
TNFSF14	0.28	0.2	398.05	322.83	727.7	435.9	94.58	71.86	110.94	163.4	7.97	10.35
TNFSF15	0.09	0.24	0.24	0.13	0.27	0.4	0.23	0.22	0.17	0.22	0.33	0.25
TNFSF4	1.16	0.01	0.28	0.31	0.25	0.43	0.14	0.33	0.21	0.24	0.83	1.15
TNFSF8	80.08	56.93	92.54	53.63	409.64	148.75	130.3	42.06	112.83	100.46	51.43	41.19
TNIP1	10.46	12.59	10.33	10.05	8.57	13.41	16.33	12.56	9.2	11.38	18.95	16.92
TNIP2	15.09	24.46	20.3	16.15	35.97	34.55	66.94	44.82	43.82	41.41	21.43	23.98
TOLLIP	8.83	8.87	21.19	19.64	34.91	34.8	18.46	17.88	13.92	15.82	15.9	16.36
TP53	20.76	22.94	9.83	7.68	30.39	41.23	74.47	91.68	52.42	57.37	80.67	98.22
TP53BP2	4.55	6.31	48.14	42.44	23.72	17.05	13.41	11.14	5.87	3.95	4.97	3.85
TRADD	56.82	64.88	8.83	9.12	7.11	9.99	13.21	15.86	13.36	16.14	63.37	60.22
TRAF1	10.19	6.95	83.31	101.81	286.23	330.11	184.89	202.54	96.04	156.82	93.38	79.5
TRAF2	13.74	17.7	16.34	19.21	50.12	62.98	49.35	51.87	40.07	61.55	32.8	35.14
TRAF3	3.53	4.31	22.69	19.2	35.49	38	16.97	16.77	8.38	9.54	7.47	8.28
TRAF3IP1	2.05	2.09	1.44	1.51	0.76	0.81	2.53	2.52	2.71	1.64	1.07	1.23
TRAF3IP2	4.45	5.16	5.45	5.42	2.49	2.22	3.11	2.47	2.86	3.29	8.51	8.23
TRAF4	2.31	2.27	18.53	17.2	36.5	30.07	39.18	38.36	27.38	12.85	13.47	15.35
TRAF5	18.53	20.21	9.12	11.93	24.19	19.44	6.94	10.84	8.96	8.74	15.19	14.33
TRAF6	8.95	6.81	9.27	8.42	7.49	6.42	6.9	6.99	4.02	4.6	5.49	4.85
TRAF7	7.04	10.44	4.64	4.61	11.82	16.19	16.08	12.67	18.25	16.62	14.54	18.12
TRAIP	2.75	1.87	2.43	1.14	0.52	1.27	0.89	1.36	10.27	9.69	14.31	18.26
TRIB3	5.04	5.42	4.17	5.6	48.97	79.6	28.65	25.01	20.69	21.91	135.67	94.56
TRIP4	16.24	14.24	17.57	16.4	24.22	22.02	27.62	23.38	21.49	19.69	23.68	22.6
TRIP6	1.65	1.41	1.66	3.89	4.17	3.02	9.05	6.72	13.41	13.62	9.67	13.57
TRPC4AP	58.47	52.86	35.57	37.01	63.41	58.34	60.46	59.73	39.64	42.68	63.87	50.42
TSPYL2	51.24	54.66	338.1	408.07	180.91	217.9	63.73	74.74	19.69	27.05	25.34	24.42
TXLNA	16.68	21.86	66.92	75.26	93.34	84.51	53.08	57.86	61.12	70.29	71.88	68.85
TXN	60.57	52.87	57.72	55.43	197.23	184.58	919.45	730.5	757.9	699.22	615.07	649.56
TYK2	27.73	21.2	17.25	19.36	15.14	21.73	23.38	22.48	21.49	24.97	27.29	28
UBB	1628.67	1641.07	2958.49	2601.88	2014.92	1878.51	3692.83	3277.7	2645.12	2910.94	1796.35	2035.56
UBE2I	35.1	40.42	47.49	51.16	74.98	79.47	103.23	100.8	89.92	108.97	99.32	106.03
UBE2M	1.69	2.06	0.71	1.26	0.98	1.32	4.08	3.19	5.11	5.01	3.54	3.36
UBE4A	14.57	16.62	39.22	38.22	33.82	30.2	26.22	26.22	21.07	16.55	19.45	15.38
UCP2	490.56	515.14	287.06	176.38	88.77	60.64	19.15	22.81	44.23	46.92	154.65	206.26
UGT8	0.84	0.79	0.76	1.38	0.76	1.2	0.49	0.57	0.24	0.4	0.75	0.27
ULBP1	0.17	0.33	0.62	0.65	1.37	3.17	1.15	0.51	0.37	0.42	5.7	2.73
UNC5CL	1.66	1.62	0.49	0.98	0.55	0.57	0.99	0.51	0.3	0.31	1.12	0.99
UNG	8.71	9.87	10.91	6.64	19.34	17.52	22.65	22.45	162.97	122.8	95.52	118.35
UPK1B	0.46	0.18	0.5	0.27	0.34	0.18	0.32	0	0.05	0.14	0.09	0.11
USF1	20.8	41.78	13.26	26.27	6.46	24.83	17.53	35.3	15.42	35.42	14.8	31.38
USP11	24.6	25.53	50.3	63.09	26.98	31.31	16.99	17.32	3.79	6.96	12.12	9.54
USP2	0.42	0.09	0.8	1.68	0.04	0.19	0.09	0.2	0.39	0.65	0.54	0.58
VAV1	28.15	28.9	10.09	16.04	6.33	7.5	8.27	10.76	19.28	23.63	25.99	30.65
VIM	423.82	397.91	2770.99	1938.27	2331.9	1407.06	539.61	342.65	204.55	172.31	577.42	420.3
WAS	4.27	6	1.28	2.28	1.06	0.48	2.22	2.08	2.23	2.73	3.02	3.99
WASF1	0.48	0.41	0.26	0.15	0.96	1.75	4.1	3.61	1.5	2.72	1.74	2.66
WIPF1	30.24	28.46	19.35	19.05	12.69	22.14	27.78	38.5	26.57	26.46	83.36	74.67
XCL1	0.06	0.35	0.58	0.07	1.7	1.31	1.19	0.03	1.05	1.97	41.7	55.73
XCL2	0	0.86	0.57	0	0.65	0	0.14	0	0.69	2.56	192.27	106.15
XRCC5	111.87	106.93	161.6	148.49	366.1	324.29	376.05	332.47	379.21	375.52	340.18	391.47
XRCC6	260.56	287.29	483.87	562.69	817.14	839.55	765.74	724.75	672.6	785.4	511.36	597.95
YWHAE	50.22	39.81	222.05	174.62	253.9	214.14	264.17	220.09	291.3	258.19	237.89	210.84
YWHAG	2.41	2.22	7.38	7.73	14.69	12.77	16.74	16.91	24.8	22.2	14.51	15.36
YWHAH	4.65	2.12	3.31	4.84	5.94	5.79	17.6	19.96	21.01	12.9	25.6	28.42
YWHAQ	82.42	95.72	235.77	267.31	392.07	343.14	687.11	504.85	597.11	500.15	308.88	354.14
YWHAZ	529.9	644.4	2563.18	2661.77	1508.88	1270.58	744.89	767.06	640.98	587.47	632.25	592.38
YY1	9.29	12.65	13.84	11.69	15.52	15.17	20.67	26.19	16.21	13.21	12.21	11.59
ZAP70	207.36	196.19	109.4	122.49	124.22	159.35	77.76	105.7	108.58	154.29	105.45	104.99
ZBTB7A	0.98	1.23	0.86	1.21	1.12	1.49	1.38	1.37	0.66	0.6	0.36	0.51
ZEB1	14.3	13.69	22.22	26.3	25.61	18.32	9.79	10.01	8.57	5.77	7.15	7.45
ZFAND5	43.3	52.76	133.01	110.41	74.59	62.01	45.8	46.12	34.8	21.74	36.09	33.61
ZFP36	355.89	516.38	668.67	597.41	214.21	259.9	118.39	104.45	25.06	31.67	63.48	47.39
